# Supplementary material for: Characterization of imine reductases in reductive amination for the exploration of structure-activity relationships
Source: PubMed Central journal article supplement — Sci Adv. 2020 May 22;6(21):eaay9320. doi: 10.1126/sciadv.aay9320 (PMC7244260; doi:10.1126/sciadv.aay9320), 2020-05-22
Supplement: aay9320_SM.pdf [file aay9320_SM.pdf]

## Supplementary Materials for

### **Characterization of imine reductases in reductive amination for the exploration of structure-activity relationships**

Sarah L. Montgomery, Ahir Pushpanath, Rachel S. Heath, James R. Marshall, Ulrike Klemstein, James L. Galman, David Woodlock, Serena Bisagni, Christopher J. Taylor, J. Mangas-Sanchez, J. I. Ramsden, Beatriz Dominguez, Nicholas J. Turner\*

\*Corresponding author. Email: [nicholas.turner@manchester.ac.uk](mailto:nicholas.turner@manchester.ac.uk)

Published 22 May 2020, *Sci. Adv.* **6**, eaay9320 (2020)

DOI: [10.1126/sciadv.aay9320](https://doi.org/10.1126/sciadv.aay9320)

#### **This PDF file includes:**

Figs. S1 to S6

Tables S1 to S4

Supplementary Materials and Methods

# 1 Supplementary figures and tables

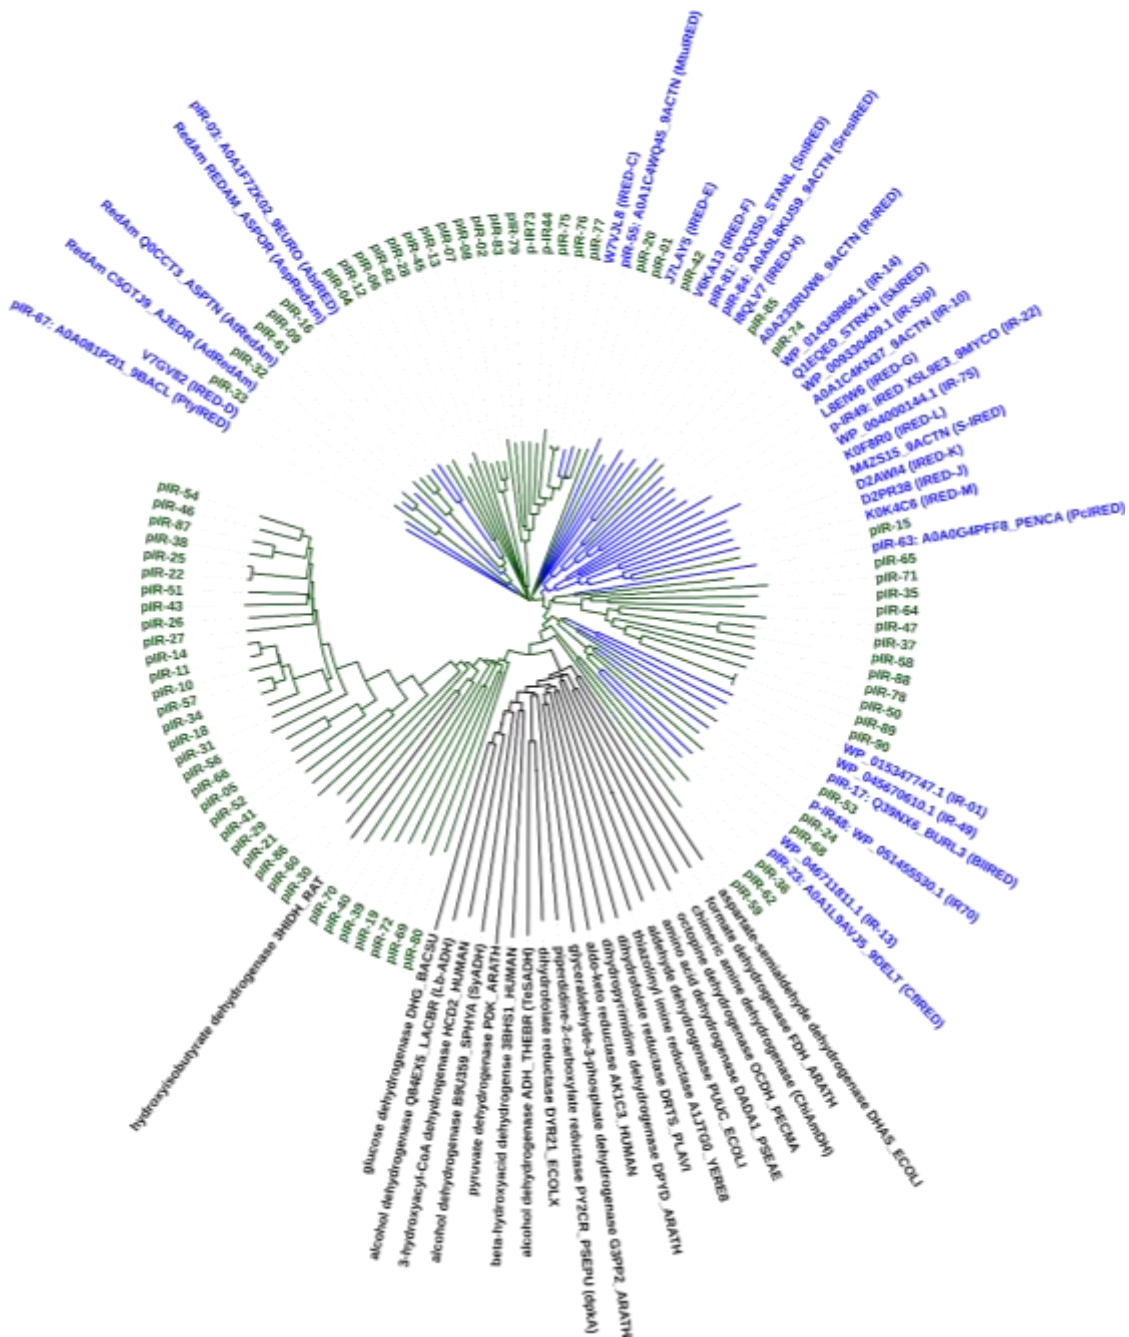

**Figure S1. Putative IREDs in phylogenetic context with other families of dehydrogenases.** The putative IREDs (green) are displayed alongside a number of previously described IREDs (blue) and characterised dehydrogenase enzymes (black).

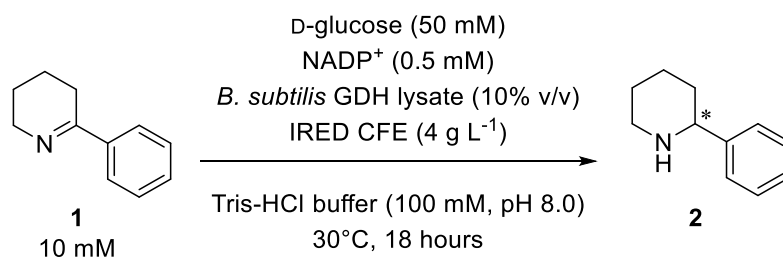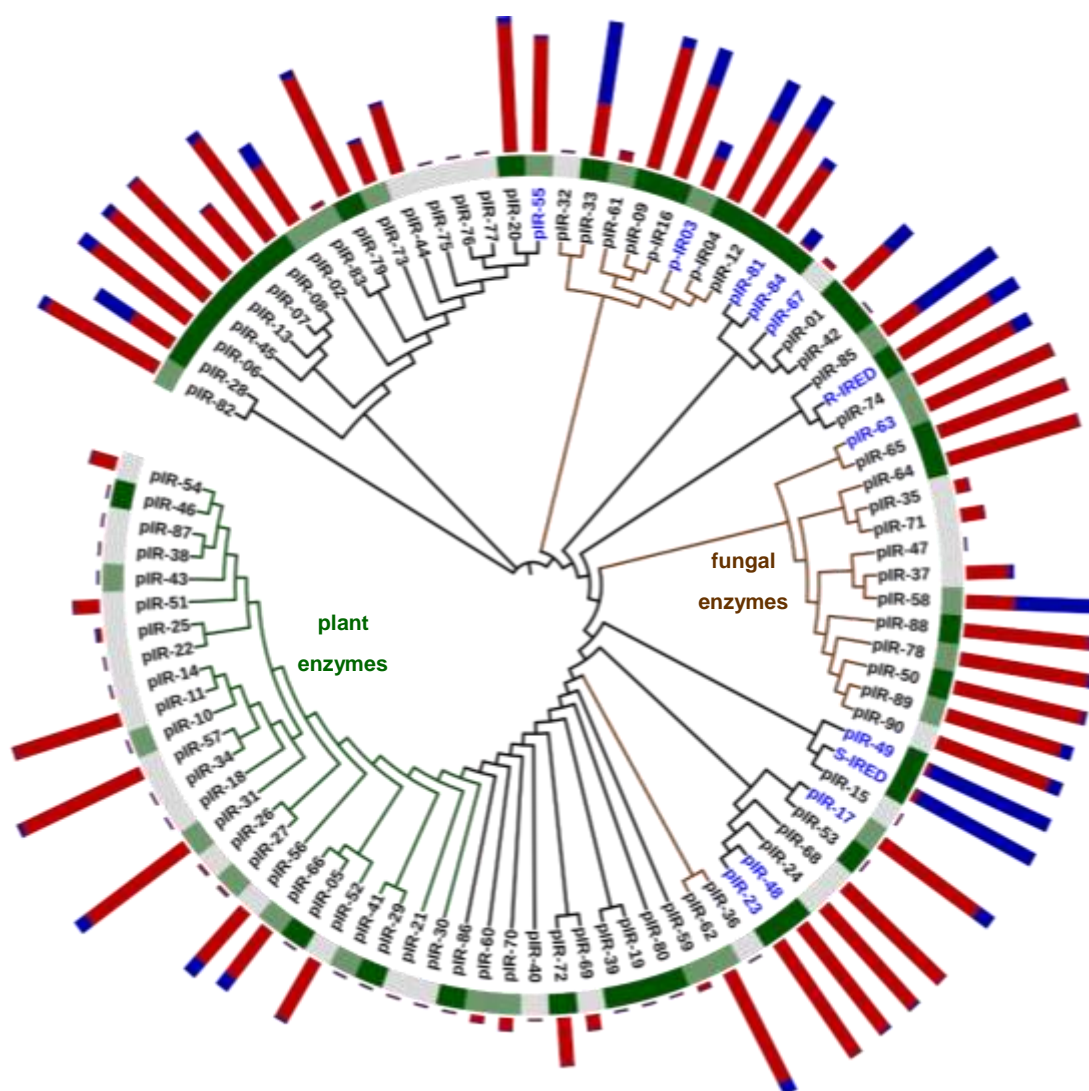

**Figure S2. Initial characterisation of putative IREDs.** Soluble expression in *E. coli* (green) and conversions to (R)-2 (blue) and (S)-2 (red, up to >99%) are shown, with stronger colours and larger bars corresponding to higher expression or conversion. Previously described IREDs are labelled in blue. Conversions were determined by GC-FID with comparison to chemically-synthesized standards.

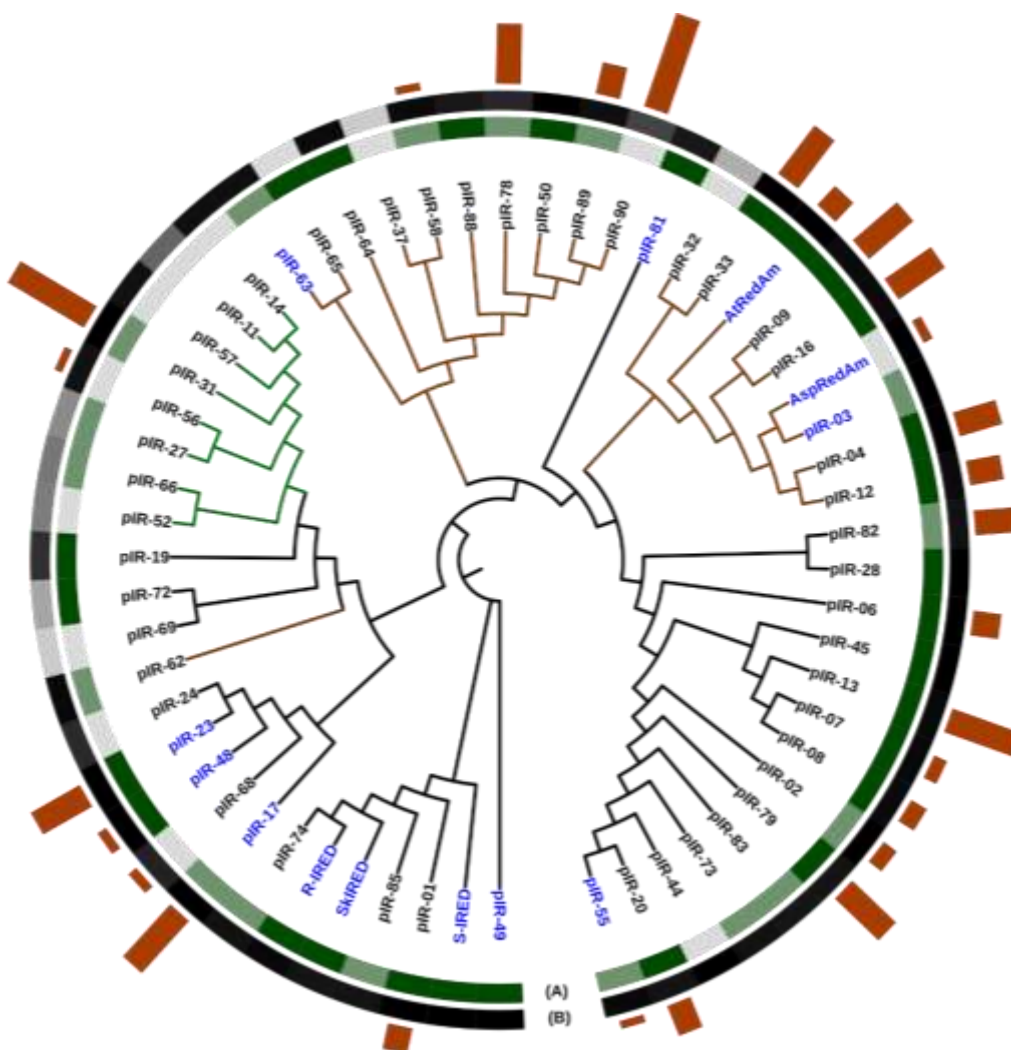

**Figure S3. Isopropylamine as a nucleophile.** Soluble expression in *E. coli* (A) and conversion to **3** (up to >99%) with 10 mM cyclohexanone and 100 mM cyclopropylamine at 30°C (B) are shown, with brown bars showing conversion to **8** (up to 49%) with 10 mM cyclohexanone and 100 mM isopropylamine at 37°C. Previously described IREDs are labelled in blue. Conversions were determined by GC-FID with comparison to chemically-synthesized standards, with darker colors and larger bars corresponding to higher conversions.

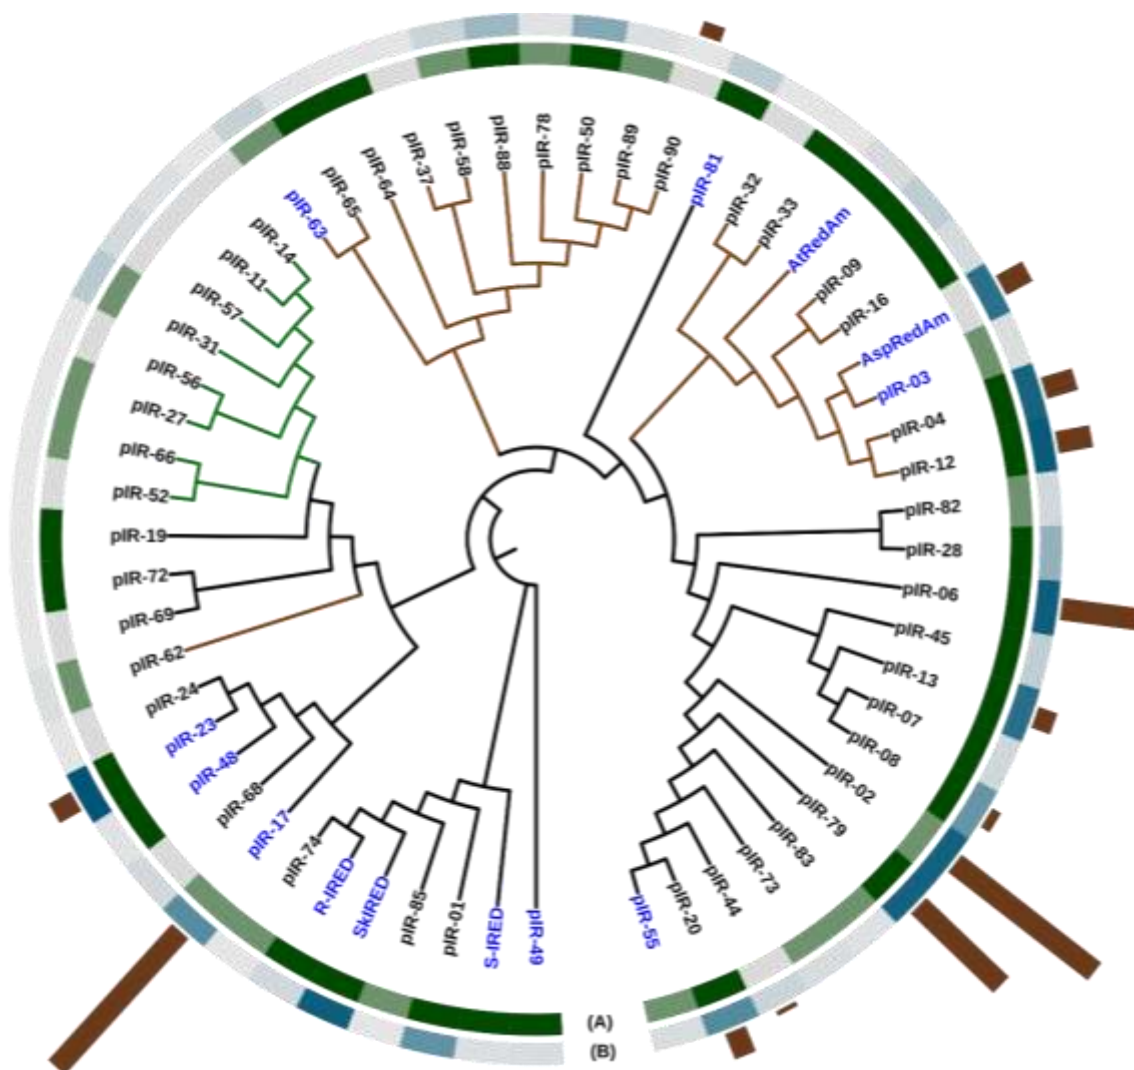

**Figure S4. Reductive aminations with benzylamine.** Soluble expression in *E. coli* (A) and conversion to **8** (up to 96%) with 10 mM cyclohexanone and 100 mM benzylamine at 30°C (B) are shown, with brown bars illustrating conversion to **14** (up to 74%) with methoxyacetone and benzylamine at 30°C.

**Table S1. Conversions to 6 with a range of co-solvents.** The total volumes of the biotransformations were 500  $\mu$ L including any co-solvent, and cyclohexanone was added from a 250 mM aqueous stock solution to avoid any addition of DMSO to the transformations. <sup>a</sup>Conversions were determined by GC-FID with comparison to a chemically-synthesized standard.

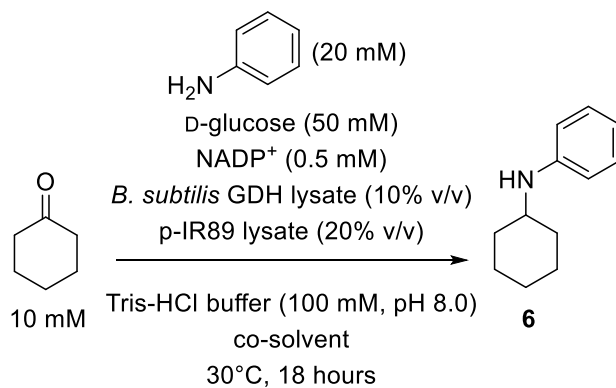

| Entry | Co-solvent          | Conversion to Product (%) <sup>a</sup> |
|-------|---------------------|----------------------------------------|
| 1     | 10% v/v EtOH        | 9                                      |
| 2     | 20% v/v EtOH        | <1                                     |
| 3     | 50% v/v EtOH        | <1                                     |
| 4     | 10% v/v cyclohexane | 41                                     |
| 5     | 20% v/v cyclohexane | 39                                     |
| 6     | 50% v/v cyclohexane | 18                                     |
| 7     | 10% v/v DMSO        | 26                                     |
| 8     | 20% v/v DMSO        | 31                                     |
| 9     | 50% v/v DMSO        | 2                                      |
| 10    | 10% v/v MTBE        | 1                                      |
| 11    | 20% v/v MTBE        | 3                                      |
| 12    | 50% v/v MTBE        | <1                                     |
| 13    | none                | 7                                      |

**Table S2. Comparison of proposed catalytic residues between IREDS.** A sequence alignment allows comparison of residues in the AspRedAm active site to analogous residues in SkIRED, p-IR23, p-IR48 and a number of novel IREDS. All gave >90% conversion to **3** in the reductive amination of cyclohexanone with cyclopropylamine.

|                 | 93 | 169 | 177 | 210 | 239 | 240 |
|-----------------|----|-----|-----|-----|-----|-----|
| <b>AspRedAm</b> | N  | D   | Y   | W   | M   | Q   |
| <b>SkIRED</b>   | S  | D   | W   | G   | T   | H   |
| <b>p-IR08</b>   | N  | D   | Y   | W   | M   | Q   |
| <b>p-IR09</b>   | N  | D   | Y   | W   | M   | Q   |
| <b>p-IR13</b>   | N  | D   | Y   | M   | M   | Q   |
| <b>p-IR14</b>   | T  | K   | A   | A   | H   | F   |
| <b>p-IR16</b>   | N  | D   | Y   | W   | M   | Q   |
| <b>p-IR19</b>   | T  | K   | A   | V   | L   | G   |
| <b>p-IR23</b>   | S  | D   | W   | T   | A   | H   |
| <b>p-IR28</b>   | T  | D   | D   | W   | M   | Q   |
| <b>p-IR48</b>   | S  | D   | W   | F   | A   | H   |
| <b>p-IR83</b>   | T  | D   | Y   | W   | M   | Q   |

**Table S3. Extended active sites of enzymes with varying conversions to 11. (A)** Comparison of theoretical extended active site residues in AspRedAm to the analogous residues in the novel IREDs p-IR07, p-IR08, p-IR13 and p-IR28. **(B)** Comparison of theoretical extended active site residues which vary across the novel IREDs p-IR07, p-IR08, p-IR13 and p-IR28.

| (A)      | 13 | 17 | 65 | 91 | 93 | 118 | 119 | 121 | 122 | 124 | 125 | 131 | 132 | 169 |
|----------|----|----|----|----|----|-----|-----|-----|-----|-----|-----|-----|-----|-----|
| AspRedAm | M  | L  | C  | L  | N  | I   | M   | V   | P   | M   | I   | V   | L   | D   |
| p-IR07   | M  | L  | C  | L  | N  | I   | M   | V   | P   | M   | I   | F   | I   | D   |
| p-IR08   | M  | L  | C  | L  | N  | I   | M   | V   | P   | M   | I   | F   | I   | D   |
| p-IR13   | M  | L  | C  | L  | N  | I   | M   | V   | P   | M   | I   | F   | I   | D   |
| p-IR28   | M  | L  | C  | L  | T  | I   | M   | V   | P   | M   | I   | F   | I   | D   |

|          | 170 | 172 | 173 | 176 | 177 | 179 | 180 | 183 | 210 | 214 | 217 | 218 | 221 | 232 |
|----------|-----|-----|-----|-----|-----|-----|-----|-----|-----|-----|-----|-----|-----|-----|
| AspRedAm | L   | L   | L   | M   | Y   | L   | F   | F   | W   | M   | Y   | L   | I   | T   |
| p-IR07   | I   | L   | L   | M   | Y   | Y   | F   | V   | W   | M   | F   | L   | S   | T   |
| p-IR08   | I   | L   | L   | M   | Y   | Y   | F   | V   | W   | M   | F   | L   | S   | T   |
| p-IR13   | I   | L   | L   | M   | Y   | N   | F   | V   | W   | M   | F   | L   | T   | R   |
| p-IR28   | I   | L   | L   | L   | D   | I   | L   | Y   | W   | M   | L   | F   | L   | A   |

|          | 235 | 236 | 237 | 239 | 240 | 244 | 246 | 247 | 261 | 264 | 268 | 280 | 281 |
|----------|-----|-----|-----|-----|-----|-----|-----|-----|-----|-----|-----|-----|-----|
| AspRedAm | S   | N   | L   | M   | Q   | V   | N   | I   | I   | I   | I   | D   | L   |
| p-IR07   | S   | N   | I   | M   | Q   | Y   | N   | L   | L   | L   | M   | D   | L   |
| p-IR08   | S   | N   | I   | M   | Q   | F   | N   | L   | L   | L   | M   | D   | L   |
| p-IR13   | S   | N   | I   | M   | Q   | F   | N   | L   | L   | L   | M   | D   | L   |
| p-IR28   | S   | N   | L   | M   | Q   | M   | Q   | M   | I   | M   | I   | D   | S   |

| (B)    | 93 | 176 | 177 | 179 | 180 | 183 | 217 | 218 | 221 |
|--------|----|-----|-----|-----|-----|-----|-----|-----|-----|
| p-IR07 | N  | M   | Y   | Y   | F   | V   | F   | L   | S   |
| p-IR08 | N  | M   | Y   | Y   | F   | V   | F   | L   | S   |
| p-IR13 | N  | M   | Y   | N   | F   | V   | F   | L   | T   |
| p-IR28 | T  | L   | D   | I   | L   | Y   | L   | F   | L   |

|        | 232 | 237 | 244 | 246 | 247 | 261 | 264 | 268 | 281 |
|--------|-----|-----|-----|-----|-----|-----|-----|-----|-----|
| p-IR07 | T   | I   | Y   | N   | L   | L   | L   | M   | L   |
| p-IR08 | T   | I   | F   | N   | L   | L   | L   | M   | L   |
| p-IR13 | R   | I   | F   | N   | L   | L   | L   | M   | L   |
| p-IR28 | A   | L   | M   | Q   | M   | I   | M   | I   | S   |



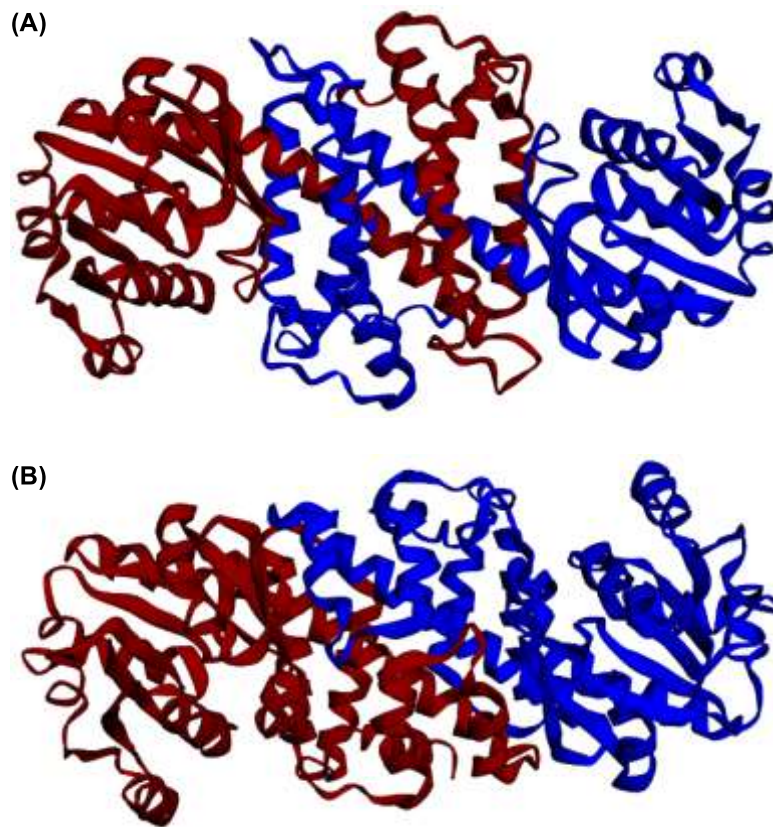

**Figure S5. IRED quaternary structures.** (A) Crystal structure of AspRedAm with NADP<sup>+</sup> bound (PDB code: 5G6R) and (B) homology model of p-IR14 from *A. thaliana*, based on  $\beta$ -HADA, PDB code: 3DOJ.



**Table S4. Reaction conditions and conversions obtained with ArpDHII.** Conversions were determined by GC-FID with comparison to chemically-synthesized standards, and are compared to conversions obtained with purified AspRedAm (2). <sup>a</sup>Aldehyde and ketone substrates were diluted from 1 M stock solutions in DMSO.

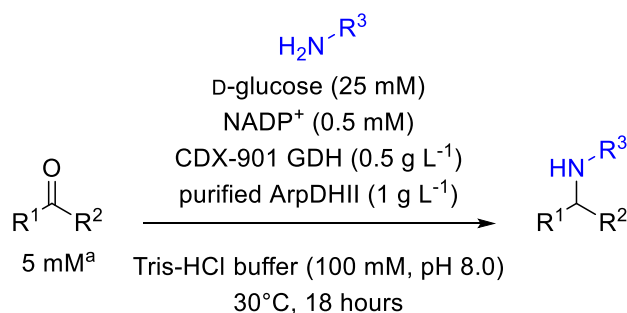

| Entry | Carbonyl Substrate  | Amine Nucleophile | [Amine Nucleophile] / mM | Enzyme   | Product (%) |
|-------|---------------------|-------------------|--------------------------|----------|-------------|
| 1     | cyclohexanone       | propargylamine    | 5                        | AspRedAm | 94          |
| 2     |                     |                   |                          | ArpDHII  | 18          |
| 3     |                     | cyclopropylamine  | 5                        | AspRedAm | 90          |
| 4     |                     |                   |                          | ArpDHII  | 93          |
| 5     |                     | allylamine        | 5                        | AspRedAm | 73          |
| 6     |                     |                   |                          | ArpDHII  | 9           |
| 7     |                     | methylamine       | 10                       | AspRedAm | 95          |
| 8     |                     |                   |                          | ArpDHII  | 15          |
| 9     |                     | benzylamine       | 5                        | AspRedAm | 84          |
| 10    |                     |                   |                          | ArpDHII  | 2           |
| 11    |                     | isopropylamine    | 100                      | AspRedAm | 94          |
| 12    |                     |                   |                          | ArpDHII  | <1          |
| 13    | hydrocinnamaldehyde | propargylamine    | 20                       | AspRedAm | 97          |
| 14    |                     |                   |                          | ArpDHII  | 97          |
| 15    |                     | cyclopropylamine  | 20                       | AspRedAm | >97         |
| 16    |                     |                   |                          | ArpDHII  | >97         |
| 17    |                     | allylamine        | 20                       | AspRedAm | >97         |
| 18    |                     |                   |                          | ArpDHII  | 89          |
| 19    | 1-indanone          | propargylamine    | 250                      | AspRedAm | 64          |
| 20    |                     |                   |                          | ArpDHII  | <1          |

## 2 Supplementary materials and methods

### 2.1 General

Solvents used were of HPLC grade, and when necessary were further dried over molecular sieves. Analytical thin-layer chromatography (TLC) was performed using commercially available pre-coated plates (Macherey-Nagel Polygram SIL G/UV254) with visualisation by UV light (at 254 nm) and ninhydrin dip. Column chromatography was performed on silica gel (Fluka, Buchs, Switzerland, 220 - 440 mesh). In cases where a large number of biotransformations were run in parallel, workup was performed with the aid of a Hamilton Microlab STAR liquid handling system (Hamilton, Bonaduz, Switzerland), and where necessary, samples were derivatized using acetic anhydride with an excess of triethylamine at 25°C prior to analysis.

Spectra from  $^1\text{H}$  and  $^{13}\text{C}$  NMR runs were recorded on a Bruker Avance 400 instrument (400 MHz for  $^1\text{H}$  and 100 MHz for  $^{13}\text{C}$ ) in  $\text{CDCl}_3$  or  $\text{CD}_3\text{OD}$  using residual protic solvent as an internal standard. Reported chemical shifts ( $\delta$ ) in parts per million (ppm) are relative to the residual protic solvent signal ( $\text{CHCl}_3$  in  $\text{CDCl}_3$ :  $^1\text{H} = 7.26$ ;  $\text{CDCl}_3$ ,  $^{13}\text{C} = 77.0$ ;  $\text{CH}_3\text{OH}$  in  $\text{CD}_3\text{OD}$ :  $^1\text{H} = 3.31$ ,  $^{13}\text{C} = 49.0$ ). Coupling constants ( $J$ ) are quoted in Hz and are rounded to the nearest 0.1 Hz.  $^1\text{H}$  multiplicities are reported as follows: singlet (s), doublet (d), triplet (t), quartet (q), multiplet (m), or broad resonance (br), or a combination of these. High-resolution mass spectrometry (HRMS) was recorded using a Waters LCT time-of-flight mass spectrometer, connected to a Waters Alliance LC (Waters, Milford, MA, USA). Data were processed with Waters Masslynx software. GC analysis was performed on either an Agilent 7890B gas chromatograph with a flame ionization detector (FID) and autosampler equipped with a 30 m Phenomenex ZB WAXplus column with 0.25 mm inner diameter and 0.25  $\mu\text{m}$  film thickness or an Agilent 6850 gas chromatograph with a flame ionization detector (FID) and autosampler equipped with a 25 m CP-Chirasil-DEX CB column with 0.25 mm inner diameter and 0.25  $\mu\text{m}$  film thickness (Agilent, Santa Clara, CA, USA). GC-MS analyses were performed on an Agilent 7890B gas chromatograph coupled to an Agilent 5977B mass spectrometer with an electron ionization source (EI) operating at 70 eV and equipped with a 30 m HP-1 ms fused silica capillary column with 0.25 mm inner diameter and 0.25  $\mu\text{m}$  film thickness.

## 2.2 IRED cloning

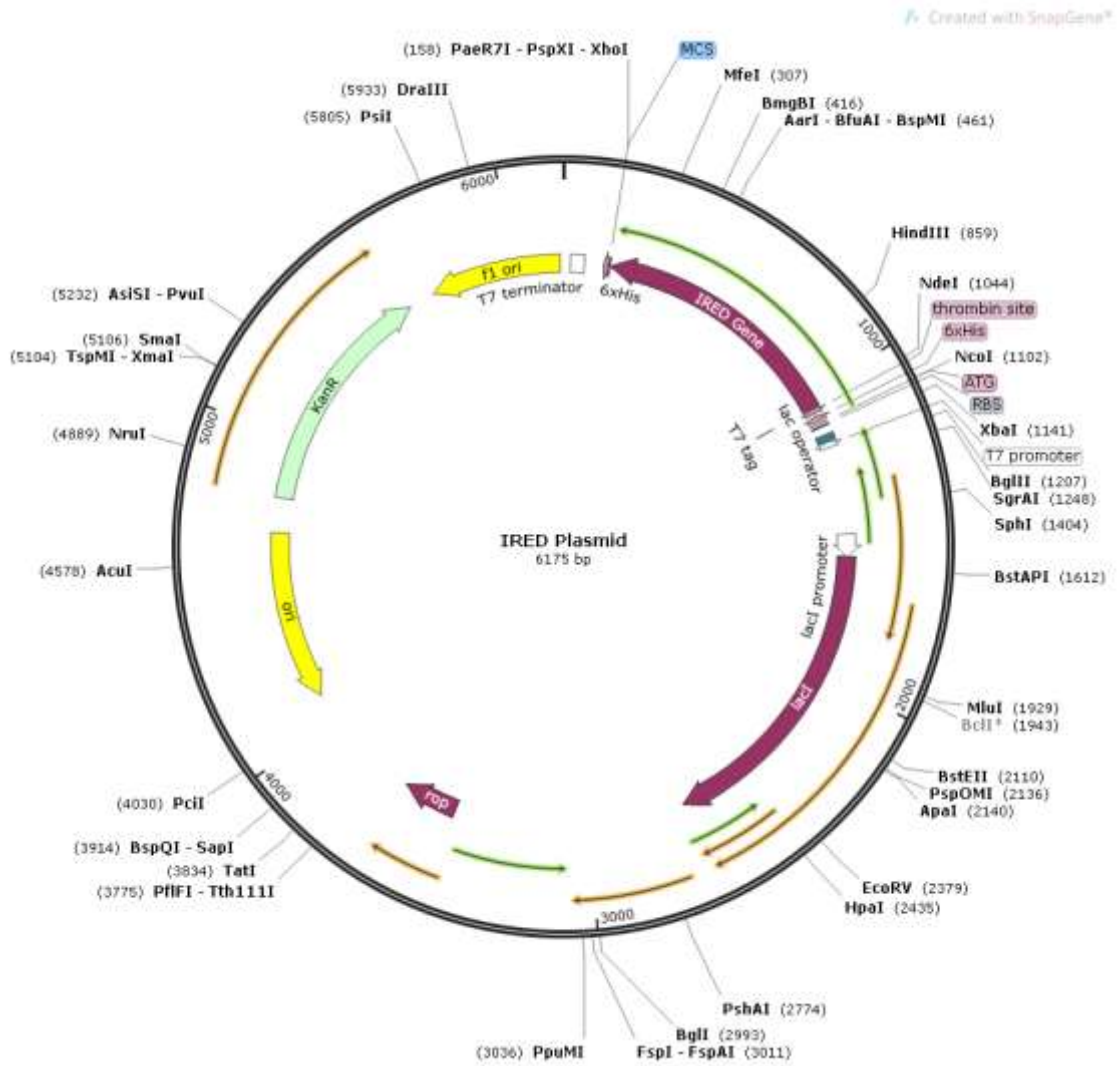

**Plasmid map for cloned IREds.** The IRED gene cloned is into a pET-28b (+) vector between *NdeI* and *XhoI* restriction sites.

IREDs of fungal origin. <sup>a</sup>p-IR03 and p-IR63 were previously characterized by Zawodny *et al.* (24).

| Enzyme              | Organism                               | UniProt ID       | Identity with AspRedAm |
|---------------------|----------------------------------------|------------------|------------------------|
| AspRedAm            | <i>Aspergillus oryzae</i>              | REDAM_ASPOR      | 100.0%                 |
| p-IR03 <sup>a</sup> | <i>Aspergillus bombycis</i>            | A0A1F7ZK02_9EURO | 84.4%                  |
| p-IR04              | <i>Aspergillus calidoustus</i>         | A0A0U5GEY4_9EURO | 62.4%                  |
| p-IR09              | <i>Aspergillus lentulus</i>            | A0A0S7DXU4_9EURO | 57.3%                  |
| p-IR12              | <i>Aspergillus nidulans</i>            | Q5AUX5_EMENI     | 57.5%                  |
| p-IR16              | <i>Aspergillus udagawae</i>            | A0A0K8L8S9_9EURO | 58.3%                  |
| p-IR32              | <i>Emmonsia parva</i>                  | A0A0H1B7G6_9EURO | 43.3%                  |
| p-IR33              | <i>Emmonsia pasteuriana</i>            | A0A1J9QMV6_9EURO | 50.0%                  |
| p-IR35              | <i>Exophiala aquamarina</i>            | A0A072NZT1_9EURO | 30.7%                  |
| p-IR36              | <i>Fonsecaea multimorphosa</i>         | A0A178C791_9EURO | 26.8%                  |
| p-IR37              | <i>Fusarium oxysporum</i>              | W9Z6K1_FUSOX     | 35.4%                  |
| p-IR47              | <i>Microdochium bolleyi</i>            | A0A136JF0_9PEZI  | 27.6%                  |
| p-IR50              | <i>Madurella mycetomatis</i>           | A0A175WBH2_9PEZI | 29.7%                  |
| p-IR58              | <i>Nectria haematococca</i>            | C7Z324_NECH7     | 32.8%                  |
| p-IR61              | <i>Penicillium arizonense</i>          | A0A1F5L0A3_9EURO | 54.6%                  |
| p-IR62              | <i>Pochonia chlamydosporia</i>         | A0A179G8F8_METCM | 31.7%                  |
| p-IR63 <sup>a</sup> | <i>Penicillium camemberti</i>          | A0A0G4PFF8_PENCA | 34.3%                  |
| p-IR64              | <i>Pseudogymnoascus</i> sp. VKM F-4516 | A0A094D824_9PEZI | 35.5%                  |
| p-IR65              | <i>Purpureocillium lilacinum</i>       | A0A179GW01_9HYPO | 39.2%                  |
| p-IR71              | <i>Rhinochadiella mackenziei</i>       | A0A0D2H0B2_9EURO | 26.5%                  |
| p-IR78              | <i>Stachybotrys chartarum</i>          | A0A084RCS9_STACH | 36.3%                  |
| p-IR88              | <i>Torrubiella hemipterigena</i>       | A0A0A1TF30_9HYPO | 31.4%                  |
| p-IR89              | <i>Myceliophthora thermophila</i>      | G2QG78_MYCTT     | 31.3%                  |
| p-IR90              | <i>Myceliophthora thermophila</i>      | N/A              | 31.3%                  |

IREDs of plant and mammalian origin.

| Enzyme | Organism                                              | UniProt ID       | Identity with AspRedAm |
|--------|-------------------------------------------------------|------------------|------------------------|
| p-IR-5 | <i>Araucaria cunninghamii</i>                         | A0A0D6R2X8_ARACU | 20.8%                  |
| p-IR10 | <i>Arabis alpina</i>                                  | A0A087GHW2_ARAAL | 19.8%                  |
| p-IR11 | <i>Arabidopsis lyrata</i>                             | D7MD48_ARALL     | 20.0%                  |
| p-IR14 | <i>Arabidopsis thaliana</i>                           | 3HID1_ARATH      | 18.3%                  |
| p-IR18 | <i>Brassica rapa</i> subsp. <i>pekinensis</i>         | M4DQA1_BRARP     | 19.1%                  |
| p-IR21 | <i>Corchorus capsularis</i>                           | A0A1R3HV54_COCAP | 20.0%                  |
| p-IR22 | <i>Citrus clementina</i>                              | V4UJW6_9ROSI     | 19.0%                  |
| p-IR25 | <i>Citrus sinensis</i>                                | A0A067FGQ9_CITSI | 19.5%                  |
| p-IR26 | <i>Cucumis sativus</i>                                | A0A0A0LIQ8_CUCSA | 20.3%                  |
| p-IR27 | <i>Daucus carota</i> subsp. <i>sativus</i>            | A0A161WTE2_DAUCA | 20.3%                  |
| p-IR31 | <i>Eucalyptus grandis</i>                             | A0A059CN57_EUCGR | 19.1%                  |
| p-IR34 | <i>Eutrema salsugineu</i>                             | V4KLI0_EUTSA     | 20.6%                  |
| p-IR38 | <i>Gossypium hisutum</i>                              | A0A1U8PU55_GOSHI | 17.7%                  |
| p-IR40 | <i>Homo sapiens</i>                                   | GLYR1_HUMAN      | 10.8%                  |
| p-IR43 | <i>Jatropha curcas</i>                                | A0A067KFP5_JATCU | 18.7%                  |
| p-IR46 | <i>Lupinus angustifolius</i>                          | A0A1J7FZG6_LUPAN | 20.0%                  |
| p-IR51 | <i>Morus notabilis</i>                                | W9T391_9ROSA     | 19.4%                  |
| p-IR52 | <i>Marchantia polymorpha</i> subsp. <i>polymorpha</i> | A0A176VNX2_MARPO | 17.4%                  |
| p-IR54 | <i>Medicago truncatula</i>                            | G7L7F1_MEDTR     | 21.1%                  |
| p-IR56 | <i>Nicotiana attenuata</i>                            | A0A1J6KVX5_NICAT | 17.1%                  |
| p-IR57 | <i>Noccaea caerulescens</i>                           | A0A1J3E499_NOCCA | 20.9%                  |
| p-IR66 | <i>Picea sitchensis</i>                               | A9NZ37_PICSI     | 18.9%                  |
| p-IR87 | <i>Theobroma cacao</i>                                | A0A061GU76_THECC | 20.4%                  |

**IREDs of bacterial origin.** <sup>a</sup>p-IR17, p-IR23, p-IR55, p-IR67, p-IR 81 and p-IR84 were previously characterized by Zawodny *et al.* (24). <sup>b</sup>p-IR48 was previously characterized by France *et al.* (8). <sup>c</sup>p-IR49 was previously characterized by Roiban *et al.* (9).

| Enzyme              | Organism                                      | UniProt ID        | Identity with AspRedAm |
|---------------------|-----------------------------------------------|-------------------|------------------------|
| p-IR01              | <i>Allokutzneria albata</i>                   | A0A1G9V2F1_9PSEU  | 37.2%                  |
| p-IR02              | <i>Allokutzneria albata</i>                   | A0A1G9SYK8_9PSEU  | 38.9%                  |
| p-IR06              | <i>Actinoalloteichus hymeniacidonis</i>       | A0A1D8BXU6_9PSEU  | 40.3%                  |
| p-IR07              | <i>Amycolatopsis japonica</i>                 | A0A075UU84_9PSEU  | 43.3%                  |
| p-IR08              | <i>Amycolatopsis keratiniphila</i>            | A0A1H2GBD9_9PSEU  | 41.4%                  |
| p-IR13              | <i>Amycolatopsis regifaucium</i>              | A0A154MR77_9PSEU  | 42.0%                  |
| p-IR15              | <i>Amycolatopsis thermoflava</i>              | WP_027931120.1    | 30.2%                  |
| p-IR17 <sup>a</sup> | <i>Burkholderia lata</i>                      | Q39NX6_BURL3      | 27.6%                  |
| p-IR19              | <i>Burkholderia vietnamiensis</i>             | A4JAJ9_BURVG      | 20.1%                  |
| p-IR20              | <i>Couchioplanes caeruleus</i>                | A0A1K0GAQ1_9ACTN  | 38.9%                  |
| p-IR23 <sup>a</sup> | <i>Cystobacter ferrugineus</i>                | A0A1L9AVJ5_9DELTA | 29.0%                  |
| p-IR24              | <i>Chelatococcus sambhunathii</i>             | A0A0K6H4A1_9RHIZ  | 24.8%                  |
| p-IR28              | <i>Devosia geojensis</i>                      | A0A0F5FDU7_9RHIZ  | 42.1%                  |
| p-IR29              | <i>Draconibacterium orientale</i>             | X5E3Y1_9BACT      | 17.2%                  |
| p-IR30              | <i>Desulfosporosinus orientis</i>             | G7W7U0_DESOD      | 21.9%                  |
| p-IR39              | <i>Granulicella mallensis</i>                 | G8P071_GRAMM      | 21.2%                  |
| p-IR41              | <i>Isosphaera pallida</i>                     | E8QYX7_ISOPI      | 19.0%                  |
| p-IR42              | <i>Jiangella alkaliphila</i>                  | A0A1H2IPN0_9ACTN  | 37.6%                  |
| p-IR44              | <i>Kitasatospora cheerisanensis</i> KCTC 2395 | A0A066Z502_9ACTN  | 27.7%                  |
| p-IR45              | <i>Kibdelosporangium phytohabitans</i>        | A0A0N9HVM7_9PSEU  | 42.7%                  |
| p-IR48 <sup>b</sup> | <i>Microvirga lupini</i>                      | WP_051455530.1    | 31.9%                  |
| p-IR49 <sup>c</sup> | <i>Mycobacterium magaritense</i>              | X5L9E3_9MYCO      | 30.5%                  |
| p-IR53              | <i>Minicystis rosea</i>                       | A0A1L6L1L9_9DELTA | 27.9%                  |
| p-IR55 <sup>a</sup> | <i>Micromonospora tulbaghiaie</i>             | A0A1C4WQ45_9ACTN  | 37.5%                  |
| p-IR59              | <i>Pseudomonas aeruginosa</i>                 | Q9I1R8_PSEAE      | 19.9%                  |
| p-IR60              | <i>Pseudomonas aeruginosa</i>                 | A0A1F0IHK4_9PSED  | 19.3%                  |
| p-IR67 <sup>a</sup> | <i>Paenibacillus tyrfis</i>                   | A0A081P2I1_9BACL  | 40.7%                  |
| p-IR68              | <i>Rhizobium gallicum</i>                     | A0A0B4XDG7_9RHIZ  | 25.6%                  |
| p-IR69              | <i>Rivularia</i> sp. PCC 7116                 | K9RL01_9CYAN      | 17.2%                  |
| p-IR70              | <i>Rhodococcus jostii</i>                     | Q0S7N9_RHOJR      | 19.5%                  |
| p-IR72              | <i>Rhodobacter sphaeroides</i>                | Q3IXE7_RHOS4      | 21.5%                  |
| p-IR73              | <i>Streptomyces albus</i>                     | A0A0B5EJP8_STRA4  | 39.1%                  |
| p-IR74              | <i>Streptomyces albus</i>                     | A0A0B5EWU4_STRA4  | 30.9%                  |
| p-IR75              | <i>Streptomyces avermitilis</i>               | N/A               | 38.1%                  |
| p-IR76              | <i>Streptomyces canus</i>                     | N/A               | 41.6%                  |
| p-IR77              | <i>Streptomyces canus</i>                     | N/A               | 41.6%                  |
| p-IR79              | <i>Streptomyces chattanoogensis</i>           | A0A0N0XYF8_9ACTN  | 40.8%                  |
| p-IR80              | <i>Synechococcus elongatus</i>                | A0A0H3K567_SYNP6  | 20.7%                  |
| p-IR81 <sup>a</sup> | <i>Stackebrandtia nassauensis</i>             | D3Q3S0_STANL      | 39.5%                  |
| p-IR82              | <i>Streptomyces noursei</i> ATCC 11455        | A0A1B2GW12_STRNR  | 38.6%                  |
| p-IR83              | <i>Streptomyces purpeofuscus</i>              | WP_030392279.1    | 38.5%                  |
| p-IR84 <sup>a</sup> | <i>Streptomyces resistomycificus</i>          | A0A0L8KUS9_9ACTN  | 38.9%                  |
| p-IR85              | <i>Streptomyces rimosus</i>                   | N/A               | 38.3%                  |
| p-IR86              | <i>Thermobifida fusca</i>                     | Q47QG6_THEFY      | 21.8%                  |



## 2.3 Protein sequences

### 2.3.1 Glucose dehydrogenase sequence

> *B. subtilis* GDH (*Bacillus subtilis*, DHG\_BACSU) (9)  
MGSSHHHHHSSGLVPRGSHMYPDLKGVVAITGAASGLGKAMAIRFGKEQAKVVINYYS  
NKQDPNEVKEEVIKAGGEAVVVQGDVTKEDVKNIQVQTAIKEFGTLDIMINNAGLENPVP  
SHEMPLKDWKVIQNTLTGAFVLSREAIKYFVENDIKGNVINMSSVHEVWPVPLFVHYAA  
SKGGIKLMTETLALAYAPKIRVNNIGPGAINTPINAKEFADPKQKADVESMIPMGYIGE  
PEEIAAVALASKEASYVTGITLFDGGMTQYPSFQAGRG\*

### 2.3.2 Characterized and putative imine reductase sequences

>AspRedAm (*Aspergillus oryzae*, REDAM\_ASPOR) (2)  
MGSSHHHHHSSGLVPRGSHMSKHIGIFGLGAMGTALAAKYLEHGKTSVWNRTTAKAIP  
LVEQGAKLASTISEGVNANDLIIICLLNNQVVEDALRDALQTLPSKTIIVNLTNGTPNQAR  
KLADFVTSHGARYIHGGIMAVPTMIGSPHAVLLYSGESLELFQSIESHLSLLGMSKYLGT  
DAGSASLHDLALLSGMYGLFSGFLHAVALIKSGQDTSTTATGLLPLLPWLSAMTGYLSS  
IAKQIDDDGYATQGSNLGMQLAGVENIIRAGEEQRVSSQMILPIKALIEQAVGEGHGGED  
LSALIEYFKVGNVD\*

>AtRedAm (*Aspergillus terreus*, Q0CCT3\_ASPTN) (2)  
MGSSHHHHHSSGLVPRGSHMATTTTTTKLIFGLGAMGTAMATQFLKQHTPTVWNRRTA  
AKANPLVEQGAHLAATIPAAIAASPLLIIFCLLDNAAVEQTLAAGPPSLAGKTILNLTNGT  
PSQARRLATLASARGARYFHGGIMATPDMIGAPHAVILYSGGGSAETYASVEGVLAVLGS  
GKYLGDAGSASLHDLALLSGMYGLFAGFLHATALVRSEGEVSAEFLLGLLAPWLQAMT  
GYLGLLARQIDDDGVYTAQTSNLEMQLVALENACAASREQGVSAEVMPLPKGLVERAVREG  
RGGHDISSLIIDYFRNASV\*

>SkIRED (*Streptomyces kanamyceticus*, Q1EQE0\_STRKN) (30)  
MGSSHHHHHSSGLVPRGSHMPDNPSTKGRMMRNQQAHTPVTVIGLGLMGQALAGAF LG  
AGHPTTVWNRRTAAKAEPLVARGAKSAGSVAEVAASPLVVVCVSDYDAVHALLDPLDGTA  
LQGRTLVNLTSQSAQARERAAWADGRGADYLDGAILAGPAAIGTADAVVLLSGPRSAFD  
PHASALGGLGAGTTYLGADHGLASLYDAAGLVMMSILNGFLQGAALLGTAGVDATTFAP  
FITQIGITVADWLPGYARQIDDGAYPADDAAIDTHLATMEHLIHESEFLGVNAELPRFIK  
ALADRAVADGHGGSGYPALIEQFRTHSGK\*

>R-IRED (*Streptomyces* sp. 3587, M4ZRJ3\_9ACTN) (12)  
MGSSHHHHHSSGLVPRGSHMGDNRTPVTVIGLGLMGQALAAAFLEAGHTTTVWNRSAGK  
AEQLVSQGAQVQATPADAVAASELVVVCLSTYDNMHDVIGSLGESLRGKVIIVNLTSGSSD  
QGRETAAWAEKQGVYLDGAIMITPPGIGTETAVLFYAGTQSVFEKYEPAKLLGGGTTY  
LGTDHGMALYDVSLGLMWTLNSFLHGVAVVETAGVGAQQFLPWAHMLWLEAIKMFTAD  
YAAQIDAGDGKFPANDATLETHLAALKHLVHESEALGIDAELPKYSEALMERSVISQGHAK  
NSYAAVLKAFKRPSE\*

>S-IRED (*Streptomyces* sp. 3546, M4ZS15\_9ACTN) (13)  
MGSSHHHHHSSGLVPRGSHMSKQSVTVIGLGPMPQAMVNTFLDNGHEVTVWNRRTASKAE  
ALVARGAVLAPTVEDALSANELIVLSLTDYDAVYAILPVTGSLSGKVIANLSSDTPDKA  
REAAKWAAKHGAKHLTGGVQVPPPLIGKPESSTYYSGPKDVFDAHEDTLKVLTNADYRGE  
DAGLAAMYQAQMTIFWTTMLSYQTLALGQANGVSAKELLPYATMMTSMMPHFLELYAQ  
HVDSADYPGDVDRLAMGAASVDHVLHTHQDAGVSTVLPAAVAEIFKAGMEKGAENSFSS  
LIEVLKKPAV\*

>ArpDHII (*Streptomyces argillaceus*, A0A1M4NDA0\_STRAA) (26)

MGSSHHHHHSSGLVPRGSHMSNTNQGPTVTLGLGMMGAALATAFVKNGNPPTVWNRSD  
KADALVEQGAFFAADIKQAEIASPVVVACVSTYEVNLNDFAGADELKGVVINTSGTP  
EDARALAVWAEQNGVRYLDGAIMAVPQMIGLPQALIFYAGAQEVYAEHEELLKPLAGTNV  
YLGADTGVAMIYDLGLLSLLWSSLAGYFHAVALVNSAGVSAEAFTPFALTWIEHVITPSI  
PQSAKEIDSASFDEISSLGVNKAIEHLVATSKQLGINSDFSAAIQALIERRVEQGHAG  
HSLASLVEAFKQG\*

>p-IR01 (*Allokutzneria albata*, A0A1G9V2F1\_9PSEU)

MGSSHHHHHSSGLVPRGSHMSTKKVTVIGLGLSALAAALLRTGHDVTWNRTPKAE  
ALVAQGATRADTVAEAAAASPVVIVCVFDEAARELLAPIQAGKAVVNLTSGPSDEAREL  
AAWAASRGVDYLDGAVMAVPAIIGTPDAFVMSYSGSREVFDAHRAALDSFGASHFLGEDAG  
VAEFHDLGLLYAGYATLVGFLNSVAIVGTAGVTARELLPLVTTWL TGMVAYLADVAREVD  
ERDYTDGASSVAINQVALDKIIAASRAAGVSPDLLLPFKELLDRAADGHARDSASSVIE  
LLRPGIHPE\*

>p-IR02 (*Allokutzneria albata*, A0A1G9SYK8\_9PSEU)

MGSSHHHHHSSGLVPRGSHMTDTSKLTLLGLGAMGSALATAWLAADYDITVWNRASR  
AEPLRTLGAQVADTAADAVAANDLVVACLDDASVRSTLDGVDLTGKDLINLTTGTPGSG  
RELAACATARGARYVDGIMAVPPMIGVPSGAYVFYSGSAAAFEHRDALAVGAGTKFV  
GEDPGFAALYDVALLSAMTGMFAGVSHAFALVRKENIDPREFAGLVSGWITAMSGYAHGI  
AEHLASGDYTTGVTSNLAMMVEGNATMLRTAHEQGVSPLELLEPFMRMLMRQVDDGHGDED  
TTGVIDLILLSRR\*

>p-IR03, AbIREN (*Aspergillus bombycis*, A0A1F7ZK02\_9EURO) (24)

MGSSHHHHHSSGLVPRGSHMISKHISIFGLGAMGAALAAARYLEHGKTTVWNRRTAKATP  
LVEQGAKLASTISEGINASDLIIICLLNNEAAEDILRDVHSLSSKTIIVNLNTPYQAR  
NLADFVTSNGARYIHGGIMAVPAMIGSPHAVLLYSGGSFELFQSIESHLSLLGMSKFLGT  
DAGSASLHDLALLSGMYGLFSGFLHAVALIKSEQSKTATGLLPLLPWLSAMMGYLSSIA  
SQIDEGDYATQGSNLEMQLVGVENILKAGKEQGISSQMILPMKALIEKAVGEGHGGEDLS  
VLIDYFKGEKSLE\*

>p-IR04 (*Aspergillus calidoustus*, A0A0U5GEY4\_9EURO)

MGSSHHHHHSSGLVPRGSHMSTITLFLGLGAMGKALAAKYIEKGYTTTIWNRTPSKAAPL  
VEKGAKLANTVGEGLASADLIILCLLDNASVRQTLQATAALNGKTVINLNTGTPSQARE  
TSEWVISHGAQYIHGGIMAVPDMIGSPHAVLLYSGESAETFSRVEAHLSHLGTSKFLGTD  
PGSASLHDLALLSGMYGLFSGFFHATALVKSQPGTTATGFVQLLTPWLSAMTHYLGALAK  
QIDEGDYATQGSNMAMQVTGVQNIVRASEEAGVTADLIMPILGRMTRAAEAGYADVDSA  
VIEFMKE\*

>p-IR05 (*Araucaria cunninghamii*, A0A0D6R2X8\_ARACU)

MGSSHHHHHSSGLVPRGSHMADKPRVWIGTGMQAMCGHILKDGYPVRFVNRTPSKA  
QTLIENGALMAENPKSVAEGSDVFTIVGYPHDVSEVILGDKGVLQGLKPGGVIVDMTTS  
EPSLAQKIYKFAKERGCESVDAPVSGGDKGAKGTTLAIFAGGDEKVVETLKPLFDCMGKV  
TYMGGPGLGQCTKLGNQITIASTMVGLVEGMVFAHKAGLDVETYIRAISSGAAGSKSLEL  
YANRILKGFEPGFVNFVKDLGISLRECQQMGLSLPGLALAQQLYVSLKAHGEGLGT  
QALVLALERLNNVQLPRMQ\*

>p-IR06 (*Actinoalloteichus hymeniacidonis*, A0A1D8BXU6\_9PSEU)

MGSSHHHHHSSGLVPRGSHMPESTTPSTATPVTIIGLGMGTALANAFLDAGHSTTVWN  
RTAARATALAARGAHHAEVTEAIAASPLVIACVLDYDAFHETLAPATDALAGRALVNL  
NGTPKQARETASWAADHRIDYLDGGIMAIIPPGIATPDSFILYSGPLGTFAHRSTLEVLG  
AANHVGTDHGLASLHDLALLTGMVGMFAGILQAFALIDSEGIPAGDLAPMLTNWLTGMAH  
SVAHYAQQIDTGDYETGVVSNLAMQSAGFANLVQAGEDQGVVDVGLLRPLFELMRHQVAAG  
YGNGDVASVIELIRREERRQPAKSPGADKITRARRP\*

>p-IR07 (*Amycolatopsis japonica*, A0A075UU84\_9PSEU)

MGSSHHHHHSSGLVPRGSHMSEHGKTPVTVTLGLGAMGTALVEALLAAGHPVTAWNRAS

WAEAVAAQGASVASTISEALAANTIVIACLLDYDSVHEVLDPVAAELEGRQLINLTNGTP  
GQAREMSAWAEEGLGAAYLDGGIMAVPPMIGTPAAFIFYSGSGTVFGHARTALDTFGGVNY  
LGADPGLAPLHDIALLSGMYGYFVGVIIQAYALVGSAGVKAREFAPLLRGWLDAMGGFLER  
SAEQIDDDGYVTDVVSNIQMAAAYPNLAQAAEDQGISAEELLTPLQLMDKRVARGHGAE  
DLIGVIELLKK\*

>p-IR08 (*Amycolatopsis keratiniphila*, A0A1H2GBD9\_9PSEU)  
MGSSHHHHHSSGLVPRGSHMSEHGKTPVTVLGLGAMGTALVEALLTAGHPVTVWNRRTAS  
RTEAVAAKASVASTVSEALAADTNAIVLACLLDYDSVHEVLDPVAAELAGRQLINLTNG  
TPGQAREMNAWAEELGAAYLDGGIMAVPPMIGTPAAFIFYSGSGTVFGRARTALETFGGV  
NYLGADPGLAPLHDIALLSGMYGYFVGVIIQAYALVGSAGVKAREFAPLLRGWLDAMGGFL  
ERSAEQIDDDGYMTDVSNIQMAAAFPNLAQAAEDQGISAEELLTPLQLMDKRVADGHG  
AEDLIGVIELLKK\*

>p-IR09 (*Aspergillus lentulus*, A0A0S7DXU4\_9EURO)  
MGSSHHHHHSSGLVPRGSHMSSVSIFGLGAMGTALASRFLLEEKYKAVVWNRSPKASPL  
LEKATLSHTALDGINASDLIVICLLDNAVQATLNSALEHLRGKTIINLTNGTPDQARK  
LSDLIVSHGAQYVHGGIMATPSMIGSPHALVLYSGSPDAFKTAEADLSVLAKCIFLGEDA  
GSASLHDLALLSGMYGLFSGFLHATALVRSSTPAVKFVDLLVPWLGAMTEYTKGMAKQID  
EGNYASEGSNLGMQLVAIQNIIDASAAQQVSADFIRPMKEFMEKAVVAGHGDDISSLID  
FVKST\*

>p-IR10 (*Arabis alpina*, A0A087GHW2\_ARAAL)  
MGSSHHHHHSSGLVPRGSHMPLLLRRYLSPSVSSSFLRRSMAYSSISTDPINPSYSSI  
STDPINPSNTKIGWIGTGMGRSMCGHLIRAGYSVTVFNRTISKAQTLIDMGAKLADSPS  
SVASQSDVVFIVGYPSDVRNVLDPNSGALSGLRKGGLVDMTTSEPSLAEEIAKSASS  
VHCFSIDAPVSGDGLGAKNGKLSIFTTGGDETTVKRLDPLFSLMGKVNFMGTSGKGQFAKL  
GNQITIASTMLGLVEGIIYAHKSGLDVKKFLEAISTGAAGSKSIDLYGDRIMKRDFDPGF  
YVNHFVKDLGICLNECQRMGLALPGLALAQQLYLSLKAHQGDLDGTQALILALERLNNVK  
IDFY\*

>p-IR11 (*Arabidopsis lyrata*, D7MD48\_ARALL)  
MGSSHHHHHSSGLVPRGSHMPLLLRRFLSPSVSSSFLRRSMASSSISSDPITPSNTKI  
GWIGTGMGRSMCGHLIKAGYTVTVFNRTISKAQTLIDMGANLADSPNSVASQSDVVFII  
VGYPDVRHVLDPKSGALSGLQQGGVLVDMTTSEPSLAEEIAKAASFENCFSIDAPVSG  
GDLGAKNGKLSIFAGGDETTVKRLDPLFSLMGKVNFMGTSGKGQFAKLANQITIASTMLG  
LVEGLTYAHKAGLDVKKFLEAISTGAARSKSIDLYGDRILKRDFDPGFYVNHFVKDLGIC  
LNECQRMGLALPGLALAQQLYLSLKAHGEGGLGTQALILALERLNNVSVQPSVS\*

>p-IR12 (*Aspergillus nidulans*, Q5AUX5\_EMENI)  
MGSSHHHHHSSGLVPRGSHMKSISLFLGSMGQALAHRYIDTGYTTTVWNRTPKAAQSS  
GLIQKGAHQALTVAEGLEAADMVILCLLDNASVRETLKAVTSLSGKTIIVNLTNGTPTQA  
RDLSWAGAHGAEYIHGGIMAVPDMISSGSPHSILLYSGKSNEVFTRIEPDLAHLGAAKF  
LGTDPGSASLHDLALLSGMYGLFSGFFHATALVRSQSDTTSEGFLELLIPWLGAMTHYL  
GLAKQIDSGDYTTQGSNIAMQVAGLENIIAASEEVGVTPAFILPIQRLMKRAAEGHGNT  
DISSLIQYLRTRE\*

>p-IR13 (*Amycolatopsis regifaucium*, A0A154MR77\_9PSEU)  
MGSSHHHHHSSGLVPRGSHMTEHGKTPVTVLGLGAMGTALVEALLAAGHPVTAWNRRTAS  
RAEGVAAKASVASTVSEALAANKTVIACLLDYDSVHEVLDPVASGLEGRQLINLTNGTP  
GQAREMSAWAEEGLGAAYLDGGIMAVPPMIGTPGAFIFYSGSGTVFGQARTALDTFGGVNY  
LGADPGLAPLHDIALLSGMYGNFIVGVIQAFALVGSAGVKAREFAPLLRGWMDAMSGFLER  
TAELIDDDGYERGVVSNIQMAAAFPNLAQAAEEQGISAEELLAPLQLMDKRVAAAGHGAE  
DLVGVIELLKK\*

>p-IR14 (*Arabidopsis thaliana*, 3HID1\_ARATH)  
MGSSHHHHHSSGLVPRGSHMPLLLRRFPSPSVSSSFLRRSMASSTISSDIITPSNTKI  
GWIGTGMGRSMCGHLIKAGYTVTVFNRTISKAQTLIDMGANVADSPNSVAEQSDVVFII

VGYPDSVRHVLLDPKSGALSGLRQGGVLVDMTTSEPSLAEETAKAASFKNCFSIDAPVSG  
GDLGAKNGKLSIFAGGDETTVKRLDPLFSLMGKVNFMGTSGKGQFAKLANQITTIASMLG  
LVEGLIYAHKAGLDVKKFLEAISTGAAGSKSIDLYGDRILKRDFDPGFVYVNHVFKDLGIC  
LNECQRMGLALPGLALAQQLYLSLKAHGEGDLGTQALLLALERLNNVSVQSSDS\*

>p-IR15 (*Amycolatopsis thermoflava*, WP\_027931120.1)  
MGSSHHHHHSSGLVPRGSHMTSATVIGLGMQAMVRVLEHGTAVTVWNRKSRADDV  
VARGAVLAGTPAEALKAAGLVILSLTDYQAMYDVLGDAGEALAGRUVVNLSSDTPQRTRE  
AAAWLAKRGATLVAGGIMVPAPLVGAEASYVFYSGPRDVFAEHEPVLRHIGRPEYLGEDH  
GLAQLFYQAEFTVFLTSLAYLQAFALLAEGADPARLVPFAREVSGLAASYLDETVSQT  
RARAYPGDLSTATMMGATAEHILQACRDAGVDLALPEAVKSYDRAIAAGHGDDNWTSLW  
EVAKR\*

>p-IR16 (*Aspergillus udagawae*, A0A0K8L8S9\_9EURO)  
MGSSHHHHHSSGLVPRGSHMSSVSIIFGLGAMGKALASRFLAEKYKVVAVWNRSPKASPL  
LEKATLSHTAVDGINASDLIIICLLDNAVQATLDSALDRLHGKTIIVNLNNGTDPQARK  
LSDLIVSHGAQYVHGGIMATPSMIGSPHALVLYSGSPDAFNAAEADLSVLANCVFLGEDA  
GSASLHDLALLSGMYGLFSGFLHATALVKSSTPAVKFLDLLVPWLGAMTEYTKGMAKQID  
EGQYASEGSNLAMQLVAVENIIDASAAQQVSADFIRPMKEFMEKAVAAGHGDDISSLID  
FVKST\*

>p-IR17, BIRED (*Burkholderia lata*, Q39NX6\_BURL3) (24)  
MGSSHHHHHSSGLVPRGSHMANTVTAQAISVIGLGMGAALAEALLAADHRVTWNRATA  
SKSAALGEVGAQVAHSAEAIDASQVVVVCVLDYGASDSSLRTPDVAARLKGKTIQTLT  
GTPEDAREASEWAREHDVAYLDGTIGCYPKIDIGTSDGSILYAGSRSTFEALRPTLANLSG  
HALFVGERFGNAAILDGAUVGFSFLGAALGFLYGAAVCDAEGISLDTYLSLALARRPFVE  
DTLQTCVQMIKKGNYSQSATLDSWAAGIGQLVAYSQESGTSSYPQEVRLARLQQAVAKG  
HGQHELAAVFEFCFRKPLANRG\*

>p-IR18 (*Brassica rapa*, M4DQA1\_BRARP)  
MGSSHHHHHSSGLVPRGSHMPLLLRRPLSPSVSSFFLRRRSMSSKSDPISPSNTRIGW  
IGTGVMGRSMCGHLIKAGYSVTVFNRTISKAQPLLAMGANLAASPNSLASQSDVVFVIVG  
YPSDVRRLDPTSGALSGLSPGGVLVDMTTSEPSLAEETSKSASSAGCFSDAPVSGGD  
LGAKNGKLSIFAGGDEATVKRLDPLFRLMGKVNFMGASGKGQFAKLANQITTIASMLVGLV  
EGIVYAHKAGLDVRKFLAISTGAAGSKSIDLYGERILKRDFDPGFVDHFVKDLGICLN  
ECQRMGLALPGLALAQQLYLSLKAHGEGGLGTQALLLALERLNNVSVQPSVS\*

>p-IR19 (*Burkholderia vietnamiensis*, A4JAJ9\_BURVG)  
MGSSHHHHHSSGLVPRGSHMDLGFVIGLGMGQAIATNLLKAGHTVRVWNRSRERAEP  
ALGAQIVATPADAFRGDAVFSMLADDAARDVFDALLAQAPRGLIHVNMATVSVLAES  
LAHAHASRGLDYVAAPVMGRPDVAAAARLTIMAGGPAEAIIDRVQPLFDAIGQKTWRFGSL  
PQHANIAKIAANFTLASAIETLGEASALLGAHGVAMRDFLDVITSSVFPGPVYAGYGGMI  
AERSYEPARFKARLGLKDVRLALQAGDAASVPLPVASVVRDSSLDALAHGGGDQDFAVLG  
EVALRRAGR\*

>p-IR20 (*Couchioplanes caeruleus*, A0A1K0GAQ1\_9ACTN)  
MGSSHHHHHSSGLVPRGSHMAQNSVEKAPVTLGLGAMGTALARTWLAGGHPLTVWNR  
PARAAALSPEGARVADSAAAANAANTLVVVCLLDDASVEEVLGTDLADKDLVNLTTSTP  
AQARARAWARERGARYLDGGIMAVPPMIGVPEIGGYVFYSGSRELFERHQQTGVPAGT  
TYVQDAGFAALHDVALLSAMYGMFAGAAHAFALIRKEDIDPASLAPLLADWLAMAPT  
HQTADQLRSGDYTKGVVSSLAMQVAGTPTFLDTAAQQGVSPELLSPYFTLMRRRLAEGSA  
EEDLTGVIDLVRK\*

>p-IR21 (*Corchorus capsularis*, A0A1R3HV54\_COCAP)  
MGSSHHHHHSSGLVPRGSHMETPYPTPTISPTQTRIGWIGIGVMGAAMASHLLSAGYSVT  
IYARNPSKAASLQSQGAHLANSPPQQLARQCDVVF TMVGNPQDVRQTVLES DGI LSG LKPG  
AVIVDHTSSPSLAREIYASARKKGCWSVDAPVSGGDI GAREGLAIFAAGVCAVVEWLK

PLFDLMGRVVTYMGEGCGQCKIGNQIMVGANLMGLSEGLVFAEKAGLDLKKYMEAIRGG  
SAGSMAMELWGRRIIERDFKPGGFAEYMKDMGMGVDVVKKEEDDGKVMVLPGAALGKQMF  
SAMVANGDGKLGTOGLITVVERINGK\*

>p-IR22 (*Citrus clementina*, V4UJW6\_9ROSI)  
MGSSHHHHHSSGLVPRGSHMPPLPLLLVLRRTAHSYSLSVSSLVTLRRRSMATVA  
STDPVCPTNTRVIGWIGTGMGRSMCAHLLNAGYTVTFNRTLSKAQPLLDIGAHLADSPH  
SLASQSDVVFIVGYPSDVRHVLLHPSSGALSGLRPGGIIVDMTTSEPSLASELSAAASS  
KNCSAIDAPVSGGDRGAKTGTLAIFAGGDESUVQKLNPLFALMGKVNYMGSGKGFQAKL  
ANQITIASTMVGLVEGMVYAHKAGLNVELFLNAISTGAAGSKSLDLYGSRILKRDFEPGF  
YVNHFVKDLGICLKECQNMGLALPGVALAQQLYLSLKAHGEGLGTQALILALERLNNVR  
LDNAVASKPSA\*

>p-IR23, CfIREd (*Cystobacter ferrugineus*, A0A1L9AVJ5\_9DELTA) (24)  
MGSSHHHHHSSGLVPRGSHMKGISVLGTGRMGSAFLVGAFLKQGYNVAVWNRTKSKCAP  
LAALGARVATTVRDAVADAEVVVVVNDYVTSALLRQDDVTGKLRGLIVQLTSGSPRQ  
AREMAAWARQHELQYLDGAIMGTPNFIGEPGGTILYSGPGALFEKYKPVLLVGGNSLHV  
GSDVGHASALDSALLSFLWGSFMFVQLQAVSVCEAEGLPLGAYMEYVQATKPMVDGAVTDF  
VKRIQTGRFAGDEKTLATVEAHHGALRHLIELCEEHGIHHAHPAAFGQLFQAALQAGHAQ  
DDFAVLNKFMK\*

>p-IR24 (*Chelatococcus sambhunathii*, A0A0K6H4A1\_9RHIZ)  
MGSSHHHHHSSGLVPRGSHMTKTCVVGAGRMGSFAFARALLAEGIETRVWNRSPEKVAPL  
VAAGAHAPESLAEAVAASDVIVNVIDYAAADALLRMLAVERALAGKVVVQLTSGSPRQA  
REAGRWAAERDIAYLDAIMATPNFIGGAETTILYSGMRQAFERHRDVLRVFGNGVVFV  
EDAGHASALDTGLLTQMWGKLFGLTQALAVVRAEFGLEAYARYMRDFQLVDAATDDLI  
ARVGEGRWRGDAATLATIEAHYSAFHHLAIGDEHGLDRALPAALDGLFKAALAAGHAAD  
DFAALMRFIERGGVRHAA\*

>p-IR25 (*Citrus sinensis*, A0A067FGQ9\_CITSI)  
MGSSHHHHHSSGLVPRGSHMPPLPLLLVLRRTAHSYSLSVSSLVTLRRRSMATVA  
STDPVCPTNTRIGWIGTGMGRSMCAHLLNAGYTVTFNRTLSKAQPLLDIGAHLADSPH  
SLASQSDVVFIVGYPSDVRHVLLHPSSGALSGLRPGGIIVDMTTSEPSLASELSAAASS  
KNCSAIDAPVSGGDRGAKTGTLAIFAGGDESUVQKLNPLFALMGKVNYMGSGKGFQAKL  
ANQITIASTMVGLVEGMVYAHKAGLNVELFLNAISTGAAGSKSLDLHGSRIKRDFFEPGF  
FVNHFVKDLGICLKECQNMGLALPGLALAQQLYLSLKAHGEGLGTQALILALERLNNVR  
LDNAVASKPSA\*

>p-IR26 (*Cucumis sativus*, A0A0A0LIQ8\_CUCSA)  
MGSSHHHHHSSGLVPRGSHMPIQFSLRSLYTQSHKLTPTLSLPLSFLRRTMSTSGDIV  
SPSTTRVIGWIGTGMGSMCSHIIKAGYKLVFNRTISKAQPLLDLGNLATSPLAVAAQ  
SDVVFIVGYPSDVRVLLDPSSGALAGLRPGGVLIDMTTSEPSLASEIAASATAKCGGA  
IDAPVSGGDRGAKNATLAIFAGGDEDEVQRLSPLFSLLGKVNYMGESGKGFQAKLANQIT  
IASTMVGLVEGMIYAKKAGLDVGLFLNAISTGAAGSKSLDLYGSRILKRDFEPGFVNHF  
VKDLGICLKECQNMGLALPGLALAQQLYVSLKAYGEGNLGTQALILSLERLNNVSLGSG  
SS\*

>p-IR27 (*Daucus carota*, A0A161WTE2\_DAUCA)  
MGSSHHHHHSSGLVPRGSHMSSITTAEPSPSNTRLGWIGTGMGLSMCSHLLKAGYTL  
TVFTRTQSKAQPLLDLGAKWAASPSSVASQSDVVFIVGYPSDVRHVTLHPNSGALSGLN  
PGGILVDMTTSDPSLAVEIADAAAAGKCFSDVAPVSGGDRGARNGSLIFAGGDKKVIDT  
LSPLFNLGKVNYMGVSGKGFQAKLGNQITIASTMVGLIEGMMFAHKAGLDLSLFINAIS  
TGAAGSKSLELYGYRILKRDFEAGFFVNHFVKDLGICLRECQNMGIAPGLALAQQLYVS  
LQAHGEGDLGTQALVLERLNNVSLQSVASSTEMA\*

>p-IR28 (*Devosia geojensis*, A0A0F5FDU7\_9RHIZ)  
MGSSHHHHHSSGLVPRGSHMTTISILGLGAMGTALANALLDAGHAVTVWNRTPGKDEAL  
VSRGARRAQTAEIAASELVVICLVYAGVETMLASAEKELSGRVVANLTTGTGPKQARA  
LAAWVEAQGAAYVDGGIMAVPPMIGTPASFIYSGNQPAFERHKAALAEFGDAVYVGPDA  
GAAPLNDIALLGILDGILSGYLHAAALIRASGGTAEGFTPLARRWAEISMISLFPDLAKQI

DSGDYRAEGGSNLAMQAAAMDQMVAAARDEGVDPVLI EPMRAL IHQRVADGFGTDDSAGV  
IELLFLNGRGKR\*

>p-IR29 (*Draconibacterium orientale*, X5E3Y1\_9BACT)  
MGSSHHHHHSSGLVPRGSHMKKIDITIGWIGTGVMGTSMLGHLNKAGYECITYTRTKSKA  
ESLLANGVKWADSPAEEVAASDVIFITIVGFPKDREVFYFGEKILAKAKPGAVLVDMTT  
EPSLAVEIYEAAKVKGIQSDAPVSGGDVGAKNGLSIMAGGEKEAFDKVYPLFESMGKQ  
IVYQGAAGSGQHTKMCNQIT IAGTMIGVCEALLYGHKAGLDLPTMLSSISGGAAGCWTLD  
NLAPRIVNRNFDPGFFVEHFVKDMGIALKEAEAMGLSLPGLALVKQLYLAVQAQGHGKLG  
THALTLALEKLSGL\*

>p-IR30 (*Desulfosporosinus orientis*, G7W7U0\_DESOD)  
MGSSHHHHHSSGLVPRGSHMKVGFIGIGAMGKPMANILRAGYSLYVNDVNEAALQELV  
AEGAKKAENPRELAREVDVITMLPNGAVVEQVLLGEGQIFAGAKPGFTVIDMSSVGPFT  
TQKMAKLASDRQVGYMDAPVSGGVKGAEEAGLTIMVGGKEKELVQRYHSLLEVMGKKIYHV  
GKTGAGDAVKIVNNLL LGINMAAAAEAFVLGTLGLDLPQVLL E IISVSSGSSYAL TAKMP  
NFIFKQGF EAGFAIDLQYKDL ELAVQTAKEAKIPMLL TNVAQQVFEQARAAGLRDDISA  
VIKPLEDLMKIKVRA\*

>p-IR31 (*Eucalyptus grandis*, A0A059CN57\_EUCGR)  
MGSSHHHHHSSGLVPRGSHMPMPSSLPLTGL LRSASPPSSSALYLLRRAMSSAAAASD  
PIAPSNTRVWIGTGVMGRSMCGHLIGAGFAVTVFNRTVSKAQPL LDMGARLADSPRSLA  
ALSDVVFISVGYPSDVRVLLDPSSGALASLRPGGVLDVMTTSDPSLAE EISAASAKGC  
HAVDAPVSGDGRGARNAALAI FAGGDPATVRRLEPLFSVMGKVNVMGGPGKGF AKLGNQ  
ITIASTMVGLVEGMVYAYKAGLDVGMFVSAISTGAAGSKSLDLYGNRILQRDFEAGFYVN  
HFVKDLGICLKECERMGLALPGLALAQQLYLSLKAHGEGLGTQALILALERLNNVKLEN  
AGSSNV\*

>p-IR32 (*Emmonsia parva*, A0A0H1B7G6\_9EURO)  
MGSSHHHHHSSGLVPRGSHMANSPVTVFGLGAMGTALATQFLQKGHKTTVRNR TAAKAQP  
LIAIGASHAPTIASAAAASSIL IICQLDKTSVMQTLQQAPTAWATKTIVDL TNGTPAHARE  
TADWALAHGAQYIHGGIMAVPSMIGQPHAMIL YSGPAEVGMYGLFSGFTHAVALVQSANVP  
AAGFVATQLIPWLTAMTQHLNLLATQVDEKDYGDGSSLDMQAKAAPNILEASAAQGVSV  
LIQPIFKLIERRVEEGGSEGLAALVGMIMKAGTKDSV\*

>p-IR33 (*Emmonsia pasteuriana*, A0A1J9QMV6\_9EURO)  
MGSSHHHHHSSGLVPRGSHMENSPTVTVFGLGAMGTALATQFLRKHRTTVWRNR TAAKAKS  
LIASGASHAPTISSAASASSL IICQSNKDSVLQTLQQEPAAWAGKTIVDL TNGTPAHARE  
TAEWALAHGAQYIHGGIMAVPSMIGQPHAVIL YSGPGKVFEEVKETLDAVGSSTYVGEDVG  
LASLHDLALLSGMYGLFSGFTHAVAMVRSARVPAAGFVATQLIPWLTAMTQHLNMLAKQVD  
DEDFDGGSSLEMQAHAVPNVLEASDAQGVSVELIRPIFMLIEKRVGEGGKEGLSALVHM  
IMKGA\*

>p-IR34 (*Eutrema salsugineu*, V4KLI0\_EUTSA)  
MGSSHHHHHSSGLVPRGSHMASKSISVPIINPNTRIGWIGTGVMGRSMCGHLIRAGYSV  
TVFNRTVSKAQTLIDMGAKLADSPNSLAAQSDVVFISVGYPSDVRHVLLDPISGALSGLNP  
GGVLDVMTTSEPSLAE EISKAASSANCF SIDAPVSGDGLGAKNGKLAIFAGGDETTVKRLD  
PLFSLMGKVNFMGTSGKGF AKLANQITIASTMVGLVEGMIYAHKSGLDVKKFLKAISTGA  
AGSKSIDLYGDRILKRDFDPGFYVNHVFKDLGICLKECQRMGLALPGLAIAQQLYLSLKAH  
GEGDLGTQALILSLERLNNVSVQPI M\*

>p-IR35 (*Exophiala aquamarina*, A0A072N2T1\_9EURO)  
MGSSHHHHHSSGLVPRGSHMTSATSGITLVGLGNMGAALAHAFKSGCLLTVWNR TSTR  
PTVVEAIKAGASFEPDLAKAISANSTIVFCVLEYKNIYQGLEPLVTSGLVKGKTMVNLTN  
GTPRDARDADKWKFDHGVASYFDGGIMVTPQNVGTPVSVVLISGEDES LLESRGVKDLIG  
AIGAPDYKGEDPGVAAGYDLALLAGMIGMFIGSLTALAMIQKQLDRAKSTAGANGAKETA  
TTGGLTEVVTTYFNPLLTALIPHNELLATAIDNNDQDNNHGNPMMMRVAMHNIIRGCEE

EGVDAENLRHFAGLADQVVHLHGPDSGLAWVHSLLLK\*

>p-IR36 (*Fonsecaea multimorphosa*, A0A178C791\_9EURO)

MGSSHHHHHSSGLVPRGSHMAISSASQQAEREVERSVSVLGLGQMGFAVAQAFTKKGY  
KTTVWNRRTAAKARPLVAAGIIVATSVGDCIASNQLVLSCFIETQVLEVLKTVDPQLCRG  
RVLVDFASGTLRETRQFQTIARELSFAYIRGSIASPPYVVGSSQIHAWYCGNETIFRSIQ  
PDLAALAQPGYIDNDPGTIALHECAGGNIFYAFAAGFVQAMAVVKASGKCHPGGAEDFVN  
KFMIPFLHTFPDTRFDWAHQIDNQNYDAHGKGARLQSAKSINLMRRFNTELGLT SVILD  
PVLSLIKHRIAQGGSSNEELSSLVETIADSKAGI\*

>p-IR37 (*Fusarium oxysporum*, W9Z6K1\_FUSOX)

MGSSHHHHHSSGLVPRGSHMTTSQSLTFLGLGNMGSALVQALLKASHKVTIWNRTTARP  
QVRAAVEAGAILLEADVQTVISRNNIIVICLLDYSSINNVLDDIPTPAFKGKTIVNLTNGT  
PKQAREMANWATSHSAKQYFDGAVMVTPQMIGGPQSFFVVSGETPEAFKPIASFLEPLGR  
PEYLGTIDAADAAARYDLAALSSMYGMFSGMFVAMALLKKGHAIADKLEPVVSGSLNPF LG  
ALISYNGLIARSWDDKAWDDNLGNPIGMQAQALGNILEACRDDGMDDGFLKNLTTAMERV  
VKDRGENGGIAVIGEYLLNGRLSNE\*

>p-IR38 (*Gossypium hisutum*, A0A1U8PU55\_GOSHI)

MGSSHHHHHSSGLVPRGSHMRSLSYLLGSLSRYPHPSQSSSTPHLTFLLRSMATSAAG  
PINPSNTRLGWIGTGVMGRSMCAHLINAGYSLTVFNRTL SKAQPLVDMGARLAQTPHDLA  
AQSDVVFVIVGYPSDVLQVLLDPVNGALSGLRPGGILVDMTTSEPSLAVEISTAASSKNC  
SSIDAPVSGDGRGAKNGTLAIFAGGDEAIVNRLNPIFTLMGKVNYMGPSGKGQFAKLANQ  
ITIASTMVGLVEGIIYAHKAGLNVASF LDAISTGAAGSKSLDLYGSRILKRDFDPGFFVN  
HFVKDLGICLKECQNMGLALPGLALAQQLYLSLKAHGEGLGTQALILALERLNNATLGS  
\*

>p-IR39 (*Granulicella mallensis*, G8P071\_GRAMM)

MGSSHHHHHSSGLVPRGSHMRVAF LGLGKMGSA LVP HLLNAGCEVTWNRSSPAKELA  
SKGATVALSAAEAVNSCEVVFSLLLNDAALEEVLFDGGVLDAMPKDAVHVSVGTISVALA  
KRLTLEHAKRGHRYVVGAPVFRPNVAAEGLWTVVGGAKEAVQSVRSLLLESYTRGMTVVS  
EEPWSAHAMKLAGNFSVAAMVATLSEAMMVAESMGVSPLEFVEMANSATFRSPLYEVYK  
TLTNPPKEVGASMELEGEKVR LFR EAAAANGVKTPLAELMGKNF DAAIEAGMKDHDWATG  
YYELVRKRQVEEPVAL\*

>p-IR40 (*Homo sapiens*, GLYR1\_HUMAN)

MGSSHHHHHSSGLVPRGSHMAAVSLRLGDLVWGKLG RYPPWPGKIVNPPKDLKKPRGKK  
CFFVKFFGTEDHAWIKVEQLKPYHAHKEEMIKINKGRFQQA VDAVEEFLRRAKGDQTS  
SHNSSDDKNRRNSSEERSRPNNGDEKRLSLESGKVKNMGEKGRVSSGSSERGSKSPL  
KRAEQSPRKRGRPPKDEKDLTIPESSTVKGMMAGPMAAFKWQPTASEPVKDADPHFHHF  
LLSQTEKPAVCYQAITKCLKICEEETGTSIQAADSTAVNGSITPTDKKIGFLGLGLMGS  
GIVSNLLKMGHTVTVWNRRTAEKCDLFIQEGARLGRTPAEVSTCDITFACVSDPKAAKDL  
VLGPGSVLQGIRPGKCYVDMSTVDADTVTELAQVIVSRGGRFLEAPVSGNQQLSNDGMLV  
ILAAGDRGLYEDCSSCFQAMGKTSFFLGEVGNAAKMMLIVNMVQGSFMATIAEGLTLAQV  
TGQSQQTLILDILNQQLASIFLDQKQCNILQGNFKPDFYLYKIYKDLRLAIALGDAVNHP  
TPMAAAA NEVYKRAKALDQSDNDMSAVYRAYIH\*

>p-IR41 (*Isosphaera pallida*, E8QYX7\_ISOPI)

MGSSHHHHHSSGLVPRGSHMTSSPSLPTVAPGRTRVWIGTGVMGRWMCGLHMNAGYAA  
TVYNRTQSKARELIDRGATLATNPREVAEASDVIFITIVGFPSDVRQVILGSDGVLGAKP  
GAIIVDMMTSEPELAREIHRVAAAARGVHAIDAPVSGD LGAREARLSIMVGGDPEPVAAV  
QPLFQIMGKTIVHQGPPGAGQHTKMVNQIL IAGNMVGVCEALLYGYKAGLDLTTVLQSVS  
GGAAGSWSLSNLAPRILKGMTDPGFYVEHF IKDMGIALAEARRMKLALPGLALVEQLYQA  
LAAQGHARDGTQAL THALARLSGF EWKAVVTTTQGGQS\*

>p-IR42 (*Jiangella alkaliphila*, A0A1H2IPN0\_9ACTN)  
MGSSHHHHHSSGLVPRGSHMTDHPVTVIGLGAMGREIARVLL EAGHPTTVWNRNLERA  
VDLVSQGATRADTVVAAVGASPLVLCVLDYAATRELL EPIAADLAGRTVVQLTTGTPKQ  
ARELAEWAAGHGIDYVDSGMMATPPMIGRPGSTFLYSGDEAAFERYPALDLLGTSRWF  
ADAGLASLYDLALLSGMYTMFAGFLHGAAMVGTAGVSAADFAESAGDWLRAMTVSLPYAA  
TFVDSGDYTTDQDVEFNKSALDVIVQASIDQGVAPDLVAPIHELLARQLAEGHGKEAFD  
RIIESIRPAVTRPA\*

>p-IR43 (*Jatropha curcas*, A0A067KFP5\_JATCU)  
MGSSHHHHHSSGLVPRGSHMILSLLRSRSHDFNTSRIHFTLPLSLFFRRSMATTTESAS  
PSNTRVWGIVGTGVMGRSMCAHLIKAGYSLTVFTRTL SKAQPLVDMGANLAQSPLAVASQS  
DVVFSIVGFPSDVRQVLLDSTTGALQGLRPGGILVDMTTSDPSLASEISAAASAKNCHSI  
DAPVSGGDRGAKNGTLAIFAGGDEAVIDRLNPLFALMGKLNMYGAPGKQGF AKLANQITI  
ACTMVGLVEGIIYAYKAGLNV EHYLNAISTGAAGSKSLESYGARILKRDFEAGFYVNHFV  
KDLGICLKECQNMGLALPGLALAQQLYLSLKAHGEGNLGTQALILALERLNNVSL ENLAS  
LQPAA\*

>p-IR44 (*Kitasatospora cheerisanensis* KCTC 2395, A0A066Z502\_9ACTN)  
MGSSHHHHHSSGLVPRGSHMSRLPSAVSEYSTRGGTSSYETRCTMPSDSNSRRCEASTF  
SVTPGSSRRSSPNRRHGCS SAHRISTFHLPPITSAASIPQTCPSGVPGLFSVAMPPPL  
RPAGSPRGKHPPESAYLITTPWTS LIGMAHTTVDP TAKTPVTL LGLGAMGTALARTWLA  
AGHPVTVWNRTPSRATALAADGASVAATAAEVAANTLVVCLLDDASIDQALAGDTLGT  
RDLVNLTTSTPEQARARA AWAHERGARYLDGGIMAVPPMIGVPQAGGYVFYSGSRELFDR  
HRPTLAVPVDTRWVGEDPGHAALHDVALLSAMYGMFAGAAHAFALIRKEDIDPTALAPLL  
ADWLTAMAPAVHQADQLRTGDYTTNVVSNLAMQVAGTPTFLATAEQQGVSPELLTPYFD  
LMRRRLAEGNGNEDLTGVVDLLLR\*

>p-IR45 (*Kibdelosporangium phytohabitans*, A0A0N9HVM7\_9PSEU)  
MGSSHHHHHSSGLVPRGSHMPDLSKPAVTVLGLGDMGSALARALLKAGYPTTVWNRTP  
KAKPLVEAGATHAPTVA DAVTASRLVIVCLLDYKSVTDVLDTARDAL TGKVLVNL TNGTP  
GQARELATRYDVDYLDGGIMAI PPMIGAPPAFVFYSGRSADFDTNKQVFEAFGGTNYVST  
DAGFAALYDIGLLSGMYGMFV GALHALSLVTSAGVPAQEFAPLLKQYVSAMLGSIDGMAE  
QIDKQDYAIDVVSNI GMQSEAYVNL TLSAEELGMSP ELLAPLGPLMARRVADGHGHEDIA  
GVVEILKKGKK\*

>p-IR46 (*Lupinus angustifolius*, A0A1J7FZG6\_LUPAN)  
MGSSHHHHHSSGLVPRGSHMASSTA AEPIPSNTRLGWIGTGVMGQSMCAHLIRAGYTL  
TVFNRTPSKAQPLLDLGAHQAHSPQALASQSDVVF SIVGYPSDVRVLLDPTSGVLSGLL  
PGGILVDMTTSEPSLAVEIAAAAAEK NCHSVDAPVSGGDRGAKNGTLAIFAGGDKDTVHR  
LEPLFSL LGKVNYMGSGKQGF AKLANQITIAS TMVGLVEGMVYAHKAGLDVGLWLD AIS  
TGAAGSKSLDLYGQRILKRDLDPGFYVNHFVKDLGICLKECQNMGIALPGLALAQQLYVS  
LKAHGEGNLGTQALILVLERLNNVSLAPAASSS\*

>p-IR47 (*Microdochium bolleyi*, A0A136IJF0\_9PEZI)  
MGSSHHHHHSSGLVPRGSHMRPCVGNMGTA AIQALRKASHSVTIWNRTKSRPQVQAAID  
AGATFEPDLAQALS RSGVIVLCLLDYATITKIFSSIGEPGAVLKGKSVINLTNGTPKEAR  
EMETYFTSLGTIVYLDGAIMVTPQMVG GPHAFLLFSSGGQGSTETPDGATSRLVELVSPIG  
KPDYLGADVGAASRYDLASLAPMYGMFAGGFLGMALLKRGKPNAKLVPVVQEKIVPMIAA  
LVPYMTGIARAWDAEDWVENDGNPVGMMAVGVQNI LAAAAD EGVDTVLEEFGGLM EKVE  
RDHGYDAGIAAVGTYLMK\*

>p-IR48, IR70 (*Microvirga lupini*, WP\_051455530.1) (8)  
MGSSHHHHHSSGLVPRGSHMKS KVCVLGAGRMGSSIARCLVSHGYQTWVWNR TAAKCEP  
LAALGATVALSVEDGIRAADVVIINVL DYAASSASLRQDSVISGLAGKTVVQLTSGSPRL  
AREEALWVESHGASYLDGAIMATPDFLGRPEATLLYSGPREVFEVHKGLLSTLGGGTSYV  
GENPGQASALDTALLTQM WGGFLGALQGM AVVEGENLNLETFRHQLTAFKPVVDAALFDL  
IDRTIARRFAGDETTLASLGAHYSAFQHLLEACEEQGLDASLPNAMDRFFRQALSLGGPE  
SDFASLAPLFRANHTVAPFAELANA\*



>p-IR49, IR-22 (*Mycobacterium mageritense*, X5L9E3\_9MYCO) (9)  
MGSSHHHHHHSSGLVPRGSHMKSKVCVLGAGRMGSSIARCLVSHGYQTWVWNRRTAAKCEP  
LAALGATVALSVEDGIRAADVVIINVLDYAASSASLRQDSVISGLAGKTVVQLTSGSPRL  
AREEALWVESHGASYLDGAIMATPDFLGRPEATLLYSGPREVFEVHKGLLSTLGGGTSYV  
GENPGQASALDTALLTQMWGGLFGALQGMVVEGENLNLETFRHQLTAFKPVVDAALFDL  
IDRTIARRFAGDETTLASLGAHYSAFQHLLLEACEEQGLDASLPNAMDRFFRQALS LGGPE  
SDFASLAPLFRANHTVAPFAELANA\*

>p-IR50 (*Madurella mycetomatis*, A0A175WBH2\_9PEZI)  
MGSSHHHHHHSSGLVPRGSHMATITSIGIGNMGAALATALLKSSSPPMNVTIWNRTASRP  
QVQSLISAGAI FEP SLAAALASSEVILLCLLDYPAISSVFSQVDASAKPLAGKTILNLTN  
GTPKQARDMEAFFKSLGAAVYFDGGMVTPQLVGTAAAFVVLSGETEQA YNERLANAGLL  
SPVGAVLYIAPDPGAASLVDCALAAMYGMFIGAFTGIGLLKRQKHERDGEAAGAKAMVD  
KVMVPVLTALVPYVGLLAEQVDKEAWMDDLGNPLAMQAEGVRNIMQSCEDGVDGTGLKF  
LSKLMKGVKEGFGPGGVA VVAKYLMK\*

>p-IR51 (*Morus notabilis*, W9T391\_9ROSA)  
MGSSHHHHHHSSGLVPRGSHMPLSLPLRSLSSHHSFNISLSLRLTLHLHRSMATAAAA  
EPTICPSNTRVWGIGTGMGRSMCAHLINAGYTLTVFNRTL SKAQPLLDMGAHLAHSPLA  
VASQSDVVF SIVGFPDVRVSLLDPS SGTLAGLRPGGVLVDMTTSEPSLAAEISSAAASK  
GCSSIDAPVSGGDRGAKNGTLAIFAGGEESVIHRLNPLFSLLGKVNVMGGPGRGQFAKLA  
NQITIAS TMVGLVEGMIYAHKAGLDVAMFLDAISTGAAGSKSLDLYGARILKRDFEPGFF  
VNHFKDLGICLKECQNLGLPLGLALAQQLYLSLKAHGEGNLGTQALILALERLNNVSL  
ESGGCSSPAPAN\*

>p-IR52 (*Marchantia polymorpha*, A0A176VNX2\_MARPO)  
MGSSHHHHHHSSGLVPRGSHMMGGTPACPTAQLVLRVFNHGRDNGHLSQSSLITLYQVAQ  
SPTAPLLACTPIPAIVDSRCVGLNFCTVSMASQSEAVKEIVSDQTRVWGIGTGMGQAMCG  
HILAAGFQVSVYNRTASKAQDLCSKGATMADSPLSVAQQSDVVF TIVGYPSDVREVMLGE  
KGILKGLRPGGIVDMTTSPQLSARELSLA AKERSCESIDAPVSGGDKGAKSGTLAIMVG  
GEKNTFELLAPLFKCMGNATYMPAGSGQSC LANQVTIASTMIGLVEGMIYAQKAGLNV  
DTFLQAI SGGAGSKSLELYSGRIRNRDFDPGFVNHFKDLGIALEECRNMDLALPGLA  
LAQQLYVSLKAHGEGALGTQALILALERLNNIKQ\*

>p-IR53 (*Minicystis rosea*, A0A1L6L1L9\_9DELTA)  
MGSSHHHHHHSSGLVPRGSHMGAALARAYINAGHRVTWNRSPSKAEPFQGQAKVAETAA  
QACSESDLTIVSVSNYQASDEVLRTP LAEQAAKGR TIVQLTSGTPGDARSGAAWAQEHGI  
EYLDGCILAYPSYIGGEQTTIFYS GPKALYDRHEATLRVIGGGTSHVGEPIGAAATLDCA  
LLESYYGATLAF LHGAACRSEKFP LDAYFAGVQAIMPLISITADMCKRMLATGDFKGTD  
CTLDIHAGAIQHIVRLSRENNVDRRIPELILSYFDRALKLGHGSDEMAAVINAIQEPPRG  
\*

>p-IR54 (*Medicago truncatula*, G7L7F1\_MEDTR)  
MGSSHHHHHHSSGLVPRGSHMPLPFLRFRSLYRHSHTHLLTRHFMTSEPITPSNTRLGW  
IGTGMGQSMCAHLIRSGYTLTVFNRTPSKAQPLLDIGATLATS PHAVASQSDVVF SIVG  
YPSDVRVSLLDPNTGALAGL KSGGILVDMTTSDPSLAVEIADAASVKSCHSIDAPVSGGD  
RGAKNGTLAIFAGGDESIVKLSPLFSSLGKVNVMGTSKGQFVKLANQITIASTMVGLV  
EGMVYAHKAGLDVGLYLDAISTGAAGSKSLELYGKRILKRDFEAGFVNHFKDLGICLK  
ECEKMGIALPGLALAQQLYVSLKAHGEGNLGTQALILVLERLNNVSLPPSVI\*

>p-IR55, MtulRED (*Micromonospora tulbaghia*, A0A1C4WQ45\_9ACTN) (24)  
MGSSHHHHHHSSGLVPRGSHMAPNTVDKTPVTL LGLGAMGTALARTWIAAGHPLTVWNR  
PARAAAI SDEGAGLADSA AAAAAANTLVVCLLDDDSVGEVLAGTDLTGKDLVNLTTGTP  
AEARSRAEWARERGARYLDGGIMAVPPMIGLPEAGGYVFYSGSRELFERHRETLGVPAGT  
TYVGRDAGFAALHDVALLSAMYGMFAGAAHAFALIRKEDIDPASLAPLLADWLVTMAPAV  
HQTADQLRGGDYTKGVSSLAMQVAGTPTFLSTAEQQGVSPPELLSPYFELMRRRLAQGGG  
EEDLTGVIDL LVRGPDHVRTSARTARTSWR\*

>p-IR56 (*Nicotiana attenuata*, A0A1J6KVX5\_NICAT)

MGSSHHHHHSSGLVPRGSHMRMRLRLLPNHQFHCYVPPQAIFTTSAGTTTHLHHTMET  
ATTEAINPSNTRLGWIGTGMGRSMCAHLINAGYTLTVFTRTPSKAQELISMGAHWVDS  
KAVASQSDVVFISVIGYPSDVRHVILDSNSGALSGLRPGGVIIDMTTSEPSLAVEIYSAAS  
AAGCSAVDAPVSGDLGARNAALSIFAGGDESIIILRNPLFNLLGRVYYMGAPGKGQFTK  
LGNQVVIAS TMVGLCEGLIYAHKAGLDLNMFLNAISTGAAGSKSLDLYGSRILSRDFEPG  
FYVNHVFKDLGICLRECQNMGLALPGLALAQQLYLSLKAHGEGNFGTQALILALERINNL  
SLASSSSVGKP\*

>p-IR57 (*Noccaea caerulescens*, A0A1J3E499\_NOCCA)

MGSSHHHHHSSGLVPRGSHMPLLLRRSFSPSVSSFFRRFSMASKSISSDPINPSNTRI  
GWIGTGMGRSMCGHLIRAGYSVTVFNRTISKAQTLVDMGAKLAESPSSLAAQSDVVFISI  
VGYPDVRHVLLDPNSGALSGLNPGGVLVDMTTSEPSLAEIESEAASSGNCFSIDAPVSG  
GDLGAKNGKLAIFAGGDETTVKRLDPLFSLMGKVNFMGTSGKQGFALANQITIASTMLG  
LVEGIIYAHKAGLDVRKFLAISTGAAGSKSIDLYGDRILKRDFDPGFYVNHVFKDLGIC  
LKECERMGLALPGLALAQQLYLSLKAHGEGDLGTQALILALERLNNVSVS\*

>p-IR58 (*Nectria haematococca*, C7Z324\_NECH7)

MGSSHHHHHSSGLVPRGSHMATPQALTFLLGNMGSALVQTLKASHRVTIWNRTVDRP  
QVKAAVEAGAILVVDVQTAISRNNIIVICLLDYSSIKTALAGISASALDGKTIVNLTNGT  
PKQAREMAAWTASHSAKHYFDGAVMVTPQMIGGPQSFFVVSQGTSEAFKPIASLLEPIGR  
PEYLGTIDAADAAARYDLAALSSMFGMFSGMFVAMALLKKGHTKTDEKLEPVVSGSLNPF  
LALIPYNGLLARSWDDKAWDDNLGNPIGMQVQALRNILEACRDDGMDGFLKNLTTVM  
EKGVVKDRGENGGIAVIGEYLLNGRLTKE\*

>p-IR59 (*Pseudomonas aeruginosa*, Q9I1R8\_PSEAE)

MGSSHHHHHSSGLVPRGSHMREHNDESFEFEVSVIGLGAMGTIMAQALLGQRRVAIWN  
RSPGKAAALVAAGAHLCESAEAAASPATIFVLLDNQATHEVLGMPGVMQALANRTIVD  
YTTNARDEGLALQSLVNRAGGHYVKGMIVAYPRNVGRRESHSIHTGDPEAFERHRALLEG  
LAGHTTFLPWDEALAFATVLAHAFAAMVAFFAVGAGVHFGLPPSKTARLMLDTSRFFV  
ADALEEAVRRELAQDFAGDQARLDVHAQAFahiAGALHAQGAWTPVFDALCQAVQRAAAM  
GYGDQDIVAVTRLFARECDTASAAGQ\*

>p-IR60 (*Pseudomonas aeruginosa*, A0A1F0IHK4\_9PSED)

MGSSHHHHHSSGLVPRGSHMSASLPSLAFAGLGLMGVPMCRLLAAGYPLAVWNRSPGK  
RELLAAEGAKAVEVPAELAADAEILMLCLADTAAREVVVFGAGGIVENARPGQLLVDFSS  
AEPATREMAAELEARCQVRRWDAPVSGGTPGAESGLAIMAGGRAADIERLRPVLSRLG  
QRLTRMGEVAGQVTKVCNQMIACNALVIAEVVALAERAGVDASLVAPALAGGFADSKP  
LQILAPQMAESRYEPVKWHVRTLLKDLDTAVKLSREQGAATPMSGLAAQLMRLHGSQGYL  
ERDPATLVEQYRTAVE\*

>p-IR61 (*Penicillium arizonense*, A0A1F5L0A3\_9EURO)

MGSSHHHHHSSGLVPRGSHMSSVILGLGAMGTALAAARFLEKKYKVAVWNRSPKASPL  
LDKGANIAQTAVDGINASDLIIICLLDNAAVQTTLAGALDQLQGKTIVNLTNGTPDQARK  
MSDLIVGHGARYVHGGIMATPMSMIGSPHALVLYSGSQAFKASEPDMMLAKCVFVSEDA  
GAASLHDLALLSGMYGLFSGFLHATALVRSSTPAVKFMDLLVPWLGAMTEYTKRMAKQID  
EGNYASEGSNIAMQLVAIQNIIDTSAQKVSADFIRPMKQFMEKAVAAGHSGDDISALIY  
FAKPS\*

>p-IR62 (*Pochonia chlamydosporia*, A0A179G8F8\_METCM)

MGSSHHHHHSSGLVPRGSHMSSSEQTVSVLGLGLMGSALAKALVQNGWKTTVWNRSPEKA  
QPLVELGASASTTAADCVRASRVITCVMDPAALQGILKLTQTQEDCKGRILVDYTSQVPS  
EMRKCEDQALALSIFYHGAILTMPSLIGMSTSTLLHSGADEITFESINPVLKAFGQSIY  
LGQDASWATLQEGILGCCFYGFAGGFVQAMALLKSSSFYVPGGAQTLMSQGILPLLTEQF  
PHIFADLARQIDEQAYDSENGIRLDTLKSSLEQLIRVNSEQGLVSNAFDPMLSLLKARI  
AQGGAAEEMSGLVEAISNPPKQT\*

>p-IR63, PciRED (*Penicillium camemberti*, A0A0G4PFF8\_PENCA) (24)

MGSSHHHHHSSGLVPRGSHMSTSEPKSISILGLGQMGHAIASNFVSQGFKTFVWNRTPS

KAADLVEQGAIQSPSSTECIRSSPLSILCVNTDDIVMDILAAAGDIPGHTIVNIVNGSPQ  
QVRKTAEKSIQYMAAGYLHGSVMASPLVRSGGAMTIFAGSSETFKKWELTLQPLGVTL  
WLLDDVGAAPLYDCSLLSILSGIFSGFMQALAMIGAAGHSETEFARGFVVP LLGQMEEWL  
VRTAEVQNKDYVAEKNGSPIAVQLDSTKHIFETAKELGVSSRLLQGF LDVVKEGVQRGQ  
GREEISGLVRLLEPK\*

>p-IR64 (*Pseudogymnoascus* sp. VKM F-4516, A0A094D824\_9PEZI)  
MGSSHHHHHSSGLVPRGSHMTTTEISIIIGLGNMGTALAHFLKANKTLTIWNRTPTAP  
SITALISAGATFVPSLPTALSASPLIILCILDYPAIDSLFATLPPGILKDKIIINLTNGT  
PRQARHLATWMQDNGVANYLDGGIMATPDMIGTPASSLFISGADEPAFASVKEEIAILGA  
PRYMGTDPGAAALYDLALLAGMYGMFAGSLTAMALMRRLLGGEETLEARVEGLLNPMMAAL  
IPYQAAMAGSVDRGSFEALGNPVMQREALKNILRACEEEGVDGGCLGYFEGLVGRVVED  
KGGDGLLAGVEGLLSKE\*

>p-IR65 (*Purpureocillium lilacinum*, A0A179GW01\_9HYPO)  
MGSSHHHHHSSGLVPRGSHMTTNTSLSGQDVSVIGLGNMVAIANCLLRAGATVTVWNR  
TASKAEQLIAQGALLALSPSACISASPITIIICLLSNATAEQALSDVQDLRRRTIINLTNG  
SPGQARQMATLLQSQKGARYIHGAIMVPP LLLGQPTSVTLCSPGSDVFHACTSVLSALGT  
PRHVGEDISQASLLDNALLSLMGGIFEGWVQALAIQVQGGVDEVEFATGLAGPFVKAMAD  
WLPRIAESVRDEQYVGGSPLRMQLEALDNIAVTGEELGVGVLLGELRGVMERAVTLGKGE  
EGIAGLVPLLTGKK\*

>p-IR66 (*Picea sitchensis*, A9NZ37\_PICSI)  
MGSSHHHHHSSGLVPRGSHMAAEKPRVGWIGTGVMGQAMCGHILSAGYSVTVFNRTLK  
AQTLCDRGAIMVDSPKSVAAESDIVFTIVGYQDVREVIIGENGLVQLKPGGTVVDMTT  
SEPSLAREIIDYAKQRCESVDAPVSGGDKGAKAGALAI FAGGEETVVEGLKPLFDCMGK  
VTYMGPGPLGQCTKLGNIITIASTMVGLVEGMVYAHKAGLDVEMYIKAISAGAAGRSRD  
LYADRILRRDFDPGFVNHFKDLGISLRECQMQGLSLPGLALAQQLYVSLKAHGEENLG  
TQALVLAERLNNVQLPKIG\*

>p-IR67, PtyIREN (*Paenibacillus tyrfis*, A0A081P211\_9BACL) (24)  
MGSSHHHHHSSGLVPRGSHMNSPNEKENHENAGADSRTPVTVIGLGMGTALAEFLK  
AGHRTTVWNRSAKADALVAKGAIARAATAAEAVSASPLIVVCVLDYEAHEILGSGVGLL  
TGRTL VNL TNGKPEQARKAAKAAEQGADYLDGGIMAI PQMIAGPGALLLYSGSPGAFET  
YRGELDVLGASQYLGEDAGLAALYDLALLSAMYGMFGGFYHAVALVGTEKVEASAFTALV  
IPWLQAMMASLPLQAQAMDANVHATDVSSLYINKIGFVNLIKASQEQGISTELVAPLQAL  
VDRAVAEGYGADGLSRLAGLLKKPQ\*

>p-IR68 (*Rhizobium gallicum*, A0A0B4XDG7\_9RHIZ)  
MGSSHHHHHSSGLVPRGSHMTSQILEFNSMTTIGFFGAGRMGASLVRTLAKSGHEVHVW  
NR TAAKAEALAPFGVQPRPTPEAAAAEAEIVFNLLDYAASDAQLRKPEVTQALKGKLLV  
QLTSGSPKAARDTGAWATGHGIAYL DGAIMATPNVIGEPDTLILFAGSKSLYQKHERV FV  
ALGGKSAFLSEDFGAASALDSALLGQMWGT LFGTLQALAINRAENIDADAYSTYKLVQP  
VIDGAERDLMQRVHDGRDRGDETFATIAAHNVALQHLRHINAERGLNPVLADAFDSLFT  
TAIQNGHVGDFAILARFMRAP\*

>p-IR69 (*Rivularia* sp. PCC 7116, K9RL01\_9CYAN)  
MGSSHHHHHSSGLVPRGSHMQIYCIHRQIKLSNMNKQKVTVLGLGAMGSRMGVNLKA  
GYSVTVWNRSPKPTAEALAAKGA VVATTPKLAVKEADVISMVTDSDASRAVWLDSETGAL  
SAMRQSAIAIESSTLTVSWKELATEFKHSGIAFLDAPVVGTRPQADSGNLIYLIGGEIE  
TLKQAEINIFL SAGGGKINHAGEIGKGMAMKLAVNAMFGIQVAAISEIIGMLIKNGFLEK  
AVQYLAELPVTSPAANKNAANLILKGNHAAMPIDLVEKDFRYVMQTAKDVEAASPISEAI  
HRVYLDVADKGYGGDNITGVAKLFV\*

>p-IR70 (*Rhodococcus jostii*, Q0S7N9\_RHOJR)  
MGSSHHHHHSSGLVPRGSHMTTTEQVSVGYIGLGNMGAPMAKRLDRPGGLIVCDTRPEA  
LEPFKGAGARVTSSPREVAENADVISVTVLNDEQVRAVVTQILD TARP GTVAVHSTISDV

TAVELADRCRAHGVDLIDAPVSGGAPGALEGLAVMVGASDDAFEKVRPFPGHWAELVVHA  
GDVAGTRMKLARNLLHFISFTAAAEAQRLAEAGLDITELGKVRHTDAITGGAGAIMLR  
DTTDLDETDNWYPIIMTHVRDLGEKDLSLAIGLGERLDVALPLARLALTGLGPGLGVDSTV  
DKKEQP\*

>p-IR71 (*Rhinoclediella mackenziei*, A0A0D2H0B2\_9EURO)  
MGSSHHHHHSSGLVPRGSHMSSTTSHITLVGLGNMGTALAHALVKAGRRVTIWNRAGTRP  
SVSELVQVGAGYGPPELPRAIAGSSTIIFCVLDYNSIHQVMDPVVTSQGTDAREMDRWMHKH  
GAARYFDGGIMVTPQLISTSTSFILCSGENEALFNDSVIDLIILGRPHYVASDPGAAAL  
YDLSLLAGMFGMFAFSMTAMALMQQIHRDGNRPHSPSGAVKFTLEDRVSTLLNPLLNALV  
PYTLNIAQSITSGRMDENFGNPMAMVSMAMQNVLRACEEEGVDGGSCLKYFADLMKAVVDER  
GGEVIGWVSTLLTK\*

>p-IR72 (*Rhodobacter sphaeroides*, Q3IXE7\_RHOS4)  
MGSSHHHHHSSGLVPRGSHMSDVTVGIAGTGRMGTAFAARRLRETGTPVRVWNRSSDRTG  
AAVDAGAEVALEALAEADLVLLSLTDAAAAEAVLAGMGAALAGRIIVEMSTLLPDQAEA  
LEAQATALGAQFLHCPVGGTVAPALKGQLLGFAGGPAETLEQARPVLERLCRRVEHLGVS  
GAAARMKLAVNPLALYWQTLGESLLLLRGAGIPAEQAIGLMAESSGGPAVLKNRAQVVV  
ETLEGADQRGTFDIAGLAKDLHLALALAEREGAALPLSAAAEERYRAALEAGLGRFDGAS  
LARRTAEG\*

>p-IR73 (*Streptomyces albus*, A0A0B5EJP8\_STRA4)  
MGSSHHHHHSSGLVPRGSHMAQNAVEKTPLLGLGAMGTALARAWLAAGHQVTVWNRT  
PGRAAPLVAEGAVLAESAAAANAANSLVVLCLLDEASVEVLGTEPAGKDLVNLTTGTP  
AEARARAAWASARDARCLDGGIMAVPPMIGVPASGAYVFYSGSHELFRHRETLAVPAGT  
TWTGTDPGHAALHDVALLSAMYGMFAGTAHAFALIRGEDIDPVAFAPLLADWLTAMAPAV  
HRTAERLKSGLDGDVSDLAMQTAGVPTFLGTAEQQGVSPPELLSPYFALMRRRLAEGGG  
GEDLAGLIDLLRRAPGTAA\*

>p-IR74 (*Streptomyces albus*, A0A0B5EWU4\_STRA4)  
MGSSHHHHHSSGLVPRGSHMAGTDRTPVTIIGLGLMGQALASAFVAAGHPTTVWNRSAD  
KAAAVVEQGTVLADTPAEVAASELLVVCLLDNDAVHAVLDPVAGSLAGRNVANLTSGSS  
DQARENAWAEVGFRLDAAIMTVPAAVGAPESVVFYSGPREAYDRHSIDLRLGGGTT  
HLGEDHALSALYDVSLLGVMMWGLNSFLQGAALLSTA EVKAADFPLALKWIDTVKLFAT  
DYAAQIDQKDGAF PANDATMEVHLGAVRHLLHESEAQGVNAELPRFVHALMERTVAKGFG  
QNSYASMSSELFRTPEK\*

>p-IR75 (*Streptomyces avermitilis*)  
MGSSHHHHHSSGLVPRGSHMLITPEPVTSLIGMTQNAVEKTPVTMLGLGAMGTALARTW  
LAAGHRLTVWNRTPARAAALATEGARVADSAAEVAANTLVIVCLLDDSSVDEVLAGIDL  
ADTDLVNLTTSTPAQARARA EWANERGARYLDGGIMAVPPMIGVPEAGSYVFCSGSRELF  
ERHQETLGPAGTTYVGM DAGFAALHDMALLSAMYGMFAGVAHAFAL IHKEDIDPTSLAP  
MLADWLVAMAPAVHQTADHLRSGDYTKGVVSTLAMQVAGTPTFLSTAEQQGVSPPELLSPY  
FELMRRRLAEGSGEEDLTGVINLLVH\*

>p-IR76 (*Streptomyces canus*)  
MGSSHHHHHSSGLVPRGSHMTQNAVEKESVTLLGLGAMGTALARTWLAAGHPLTVWNRT  
PARAASLAADGAKVADSAAAANAANLVVCLLDDASVEDALGTDLGKDLVNLTTSTP  
AQARARA EWARERGARYLDGGIMAVPPMIGVPESGGYIFYSGSPELFQRHRETLVVPAGT  
VYVGH DAGFAALYDMALLSAMYGMFAGAAHAFALIRKEDIDPASLAPLLADWLVAMAPAV  
HRTADQLRSGDYTKGVVSNLAMQVAGT PAFVSAAEQQGVSPPELLSPYFALMRRRLAEGSG  
EEDLTGVIDLLVR\*

>p-IR77 (*Streptomyces canus*)  
MGSSHHHHHSSGLVPRGSHMTQNAVEKESVTLLGLGAMGTALARTWLAAGHPLTVWNRT  
PARAASLAADGAKVADSAAAANAANLVVCLLDDASVEDALAGTDLGKDLVNLTTSTP  
AQARARA EWARERGARYLDGGIMAVPPMIGVPESGDYIFYSGSPELFQRHRETLVVPAGT

VYVGH DAGFAALYDMALLSAMYGMFAGAAHAFALIRKEDIDPASLAPLLADWL VAMAPAV  
HRTADQLRSGDYTQGVVSNLAMQVAGTPAFVSAEQGVSPELLSPYFALVRRRLAEGSG  
EEDLTGVIDL LVR\*

>p-IR78 (*Stachybotrys chartarum*, A0A084RCS9\_STACH)  
MGSSHHHHHSSGLVPRGSHMSQITCIGIGNMGAALQAALLKAETPVTIWNRTVDRPQV  
KAVIEAGGILEPNIELAIQKSDIIVICVLNYETIFHALAPLKSSTSP LANKKIINLTNGT  
PRQAREAEW MNARGASQYFDGAVMVTPSLVDSPHSFLVYSGEEDDFSSVATALKPLGQ  
ALYVAPDASAASAFDLAALAAMYGMFSGAFIGMSLLKRQFGKTVPGVDKVVLPVLTALVP  
YVGLIAKSVDEKSWMEDNLGNPLAMQLAGVGNILQACKDEGVHGAGLEFLAAMMERAVGE  
GAGDGGVAAVGDYLLVD\*

>p-IR79 (*Streptomyces chattanoogensis*, A0A0N0XYF8\_9ACTN)  
MGSSHHHHHSSGLVPRGSHMTDNKVGSSHDTAGTRPLTLLGLGAMGAALGHAWLAAGYP  
LTVWNRTPGRAEPLAAQGAQVAGTAAEAVAANRLVVVCLLNDDTLGETLDGVDLAGKDLV  
NLTTSTPGQARVRAEWARERGARFLDGGIMAVPPMIGAPGSGASVFYSGSRALFDAHAEA  
LAVPAGTAYVGEDPGFAALHDVALLSAMYGMFAGVAHAFALIRKEEIPPKDFAPLLSGWL  
TAMTSSVHQAAAQLESGDYTKNVVSNLAMQVAGSETLLGTAEEQVSAELLTPYLALMER  
RLAEGHGDEDTTGLIDL LVRRTGR\*

>p-IR80 (*Synechococcus elongatus*, A0A0H3K567\_SYNP6)  
MGSSHHHHHSSGLVPRGSHMVGEEQETRMRCGLIGTGLLGTAI AERLLTVGQLLTVWNRT  
AERSQPLVALGATIAPTAAALADCEVCLLLLSDAEIAAATLLTEESRSQLVGKTI IQMG  
TISPAESRAIADQIAAAGGQYLEAPVLGSLPEARNGTLIVMGAEP AVFEQWRSLLCHLS  
PEPEWIGPIGTAATLKLALNQLIGSLTSAFGGSLALLQRSGLAVEPFMAILRQSALYAPT  
FDKLSRLLSHQYDNPFP TTHLAKDLRLFRETAADLGITTD AVEGVESIVQKAI AQGWG  
DQDYSALYEAINPDSN\*

>p-IR81, SnIRED (*Stackebrandtia nassauensis*, D3Q3S0\_STANL) (24)  
MGSSHHHHHSSGLVPRGSHMTKTPVSVIGLGRMGATIAEIYLREGHPTTVWNRTPAKAE  
PLLAGGARPAATVAEAVAASPVSVIMLADDTVVRASLESATSELDGRTIVNLTTGRPDEA  
RELGDWLAGHGAEYLDGGVLGVPQTLATPESV IYSGSTAANQRHGEIVAALGTARYLGA  
DHGLASLNDMAILSGMYGLFSGYFHSVAMV DSEGFKAAEF TKDLLIPWLR SIVDVLPTLA  
DEIDSGDY PVNFSNL DVNVAGIENIMRTSRSQGVTDAPLVPLRDALAAQQEKHGGEASF  
RAVEELKSSE\*

>p-IR82 (*Streptomyces noursei* ATCC 11455, A0A1B2GW12\_STRNR)  
MGSSHHHHHSSGLVPRGSHMSVDDSVGNAAGNAVGVQVEGNSAVNAAGNAAGAAARRNVA  
VLGLGDMGTALAAAL LAAGHRVTVWNRTARKADGLVEQGARRAASPAEAI GASDVVIVCI  
LDYADVAPLLSDDGADAALKGKVVVNTNGSPA EARELAERVAGLGADYLDGGIMAVPEI  
IGAPQAVVLYSGAKDAFEAHREVLDAFAGSVYLGADPGLAPLNDLALLSGMYGMFGGFLH  
AAGLVR SAGGNVTAFTTELLIPWLRAMADSQLPAMAAQVDSGDY GATGSNLAMQVSHDAI  
GDVSR AQGVSTELFAPLWELMKRRVADGHGAESVGGVVELVHPREARA\*

>p-IR83 (*Streptomyces purpeofuscus*, WP\_030392279.1)  
MGSSHHHHHSSGLVPRGSHMTTNDTATRPGSTPSATTAPAPL TLLGLGAMGAALADAWL  
SAGHPLTVWNRTAARAEPFAAKGAI TAATPAAVAANRLVVVCLLDDES VGEALAGVDLT  
GKDIVDLVTGPTARARA AWAADR GARYLDGGIMAVPPMIGVPQAGPYV FYSGSRELFE  
EHREVLAVPAGTRYVGEDAGFAALHDVALLSAMYGMFAGVAHAFALVREESVDPVAFAPL  
LSSWL TAMTGSVATTARQLAAGDYTEGVVSDLAMQVAGVPTFLRTAE EQVSAELLTPYF  
DLMKRR LVADARHGAEDLTGVVDLLRG\*

>p-IR84, SresIRED (*Streptomyces resistomycificus*, A0A0L8KUS9\_9ACTN) (24)  
MGSSHHHHHSSGLVPRGSHMSNTSPVTVLGLGDMGRALAAAF LAEERATTVWNRTAAKA  
DELISLGA VRADSVAEAVTGSPLVVVCLLDYGVVRETL EPVAGQLRGR TVVNL TNGTPSQ  
AAEMA AVTGHGGDYLDGGIMAVPTTVATPEAFILYSGEQRI FDTYRGV LGELGSARYLG  
DDIGLASLYDLALLSGMHLMF DGFHHAVAMATSQEGGSAFGFTELLVPWLTNMARLLPAF

AAEVDADLTAAEPRLTQGLDVQVSGLANIMDAARDAGVSTTPLESSMAALEALLAHGHK  
VWSAPASVRQLRTAP\*

>p-IR85 (*Streptomyces rimosus*)

MGSSHHHHHSSGLVPRGSHMRSEPAAVTVLGLGSMGTALAGALLKGGHATTVWNRSPHK  
AKPLAERGATVAATPEEVAASPLLIACVLDYAALHTVLDPVADSLAGKTLVNLTSGSPE  
QAEEAAWARAHGAHYLDGAIMTPPGVGSPEMMFLYSGERTVFDTHRPVSLASLGDPLHL  
GTDPLASLYDAALLGLMWAAMTGWLHGTAALVGAEGTPATAFTPVAIRWLSAVTGFLT  
APQVDAGHYPGDDATVDVQIAAIDHLIHAAAARGVDNALPELLKATMERTRAAGHGSSSY  
ASVIETLRKAAGTR\*

>p-IR86 (*Thermobifida fusca*, Q47QG6\_THEFY)

MGSSHHHHHSSGLVPRGSHMARIAGLGLGIMGSPMAVHFHNAGHQVVGYNRTPAKTKAL  
VEAGGTAASVSEAVADADVALLMVTDTDPDVEVLTGAGGVFETAKPGTLIIDFSTIRPD  
VTADLAAQARSRLRMVDAPVSGGEVGAQNATLSIMVGGTEEDFAAARPFLEVVGKTI  
VHVGPSGSGQTVKAAQNLIVAGHLAVLAEAIIVFLEAYGVDVSAALDVLGGGLARSA  
IMEHKAELMRRRSFTPGFRLDLHKKDLGIVTTAAREAGVVIPVAAAAAQLIAAARANG  
DGDLDHSA LFRTIARLSGRD\*

>p-IR87 (*Theobroma cacao*, A0A061GU76\_THECC)

MGSSHHHHHSSGLVPRGSHMRSPLPFLRLTSLRHYLHSQTPSPPHLTFLHRSMATSATAE  
PISPSNTRLGWIGTGVMGRSMCAHLINAGYTLTVFNRTLKSAQPLVDMGARLAQTPHDLA  
AQSDVVFISVGYPTDVRQVLLDPTNGALSGLSPGGVLVDMTTSEPSLAVEISAAASSKNC  
SSIDAPVSGDGRGAKNGTLAIFAGGDEAIVRRLNPLFTLMGKVNVMGSPGKGQFAKLANQ  
ITIASTMVGLVEGIVYAHKAGLNVASFDAISTGAAGSKSLDLYGSRILKRDFEPGFFVN  
HFVKDLGICLKECQNMGLALPGLALAQQLYLSLKAHGEGNLGTQALILALERLNNVTLDS  
\*

>p-IR88 (*Torrubiella hemipterigena*, A0A0A1TF30\_9HYPO)

MGSSHHHHHSSGLVPRGSHMNMTTSRNVTAFGVGNMGAALAHALLKADTKVTIWNRTVD  
RPQVQSVLKAGATLEADVKAASISGSSDILLFCLIDYDAMYKTLLEIKGTSDFLAGKTIVN  
VTNGTPQQALEMRDWIKARGAARYFDGAVLVTPQMVATPQSLLVYSGESQETFDNIKTIL  
QPLGTPLYYGPQVDAQAQLAMLATMYGMFYGAFVGFGLKRSQGQDVKVAPGKQIT  
IPVMAALTEYLGLLADVDSWASNGGNPLLMQVAGVANI IQAAKDANVNASGLEVLAE  
AMGKAIVEDGWADGNVAAAAKFI\*

>p-IR89 (*Myceliophthora thermophila*, G2QG78\_MYCTT)

MGSSHHHHHSSGLVPRGSHMATITSIGIGNMGAALASALLKSVGLRQLTIWNRTADRPQ  
VKSLVEQGAHFEPVSAAAVARSDTILICLLDYQTVAVFEAISPGLAGKTVINVTNGTP  
RQAREAEARFKGLGAAAAYFDGGIMVTPQQIGTPEAFVILSGEDESAFRAAGGPAELLEP  
IGAIQYVSDAGAAAALYDLAALAAMFGMFAFAGFTGIALLLKKQKRQRQDGGKEEGDRDNKA  
LAKPATDSVIVPVLNLPVYVGMIADEVDRENWMNDMGNPLKMQAIALHNL RACEEEGV  
DGEGLKFI SRRMDRAVADGFGPGGVSIAIARYMFK\*

>p-IR90 (*Myceliophthora thermophila*)

MGSSHHHHHSSGLVPRGSHMATITSIGIGNMGAALASALLKSVGLRQLTIWNRTADRPQ  
VKSLVEQGAHFEPVSAAAVARSDTILICLLDYQTVIAVFEAISPGLAGKTVINVTNGTP  
RQAREAEARFKGLGAAAAYFDGGIMVTPQQIGTPEAFVILSGEDESAFRAAGGPAELLEP  
IGAIQYVSDAGAAAALYDLAALAAMFGMFAFAGFTGIALLLKKQKRQRQDGGKEEGDRDNKA  
LAKPATDSVIVPVLNLPVYVGMIADEVDRENWMNDMGNPLKMQAIALHNL RACEEEGV  
DGEGLKFI SRRMDRAVADGFGPGGVSIAIARYMFK\*

## 2.4 Sequence alignments of imine reductase variants

### 2.4.1 Putative imine reductases Q82Q44\_STRAW and p-IR75 from *S. avermitilis*

|              |     |                                                     |     |
|--------------|-----|-----------------------------------------------------|-----|
| Q82Q44_STRAW | 1   | -MITPEPVTSLIGMTQNAVEKTPVTMLGLGAMGTALARTWLAAGHRLTVW  | 49  |
|              |     | :                                                   |     |
| p-IR75       | 1   | MLITPEPVTSLIGMTQNAVEKTPVTMLGLGAMGTALARTWLAAGHRLTVW  | 50  |
| Q82Q44_STRAW | 50  | NRTPARAAALAAEGARVADSAAEAVAANTLVIVCLLDDSSVDEVLAGIDL  | 99  |
|              |     | .                                                   |     |
| p-IR75       | 51  | NRTPARAAALATEGARVADSAAEAVAANTLVIVCLLDDSSVDEVLAGIDL  | 100 |
| Q82Q44_STRAW | 100 | ADTDLVNLTTSTPAQARARAEWANERGARYLDGGIMAVPPMIGVPEAGSY  | 149 |
|              |     |                                                     |     |
| p-IR75       | 101 | ADTDLVNLTTSTPAQARARAEWANERGARYLDGGIMAVPPMIGVPEAGSY  | 150 |
| Q82Q44_STRAW | 150 | VFCSGSRELFERHQETLGIPAGTTYVGM DAGFAALHDMALLSAMYGMFAG | 199 |
|              |     |                                                     |     |
| p-IR75       | 151 | VFCSGSRELFERHQETLGIPAGTTYVGM DAGFAALHDMALLSAMYGMFAG | 200 |
| Q82Q44_STRAW | 200 | VAHAFALIHKEDIDPTSLAPMLADWLVAMAPAVHQTADHLRSGDYTKGVV  | 249 |
|              |     |                                                     |     |
| p-IR75       | 201 | VAHAFALIHKEDIDPTSLAPMLADWLVAMAPAVHQTADHLRSGDYTKGVV  | 250 |
| Q82Q44_STRAW | 250 | STLAMQVAGTPTFLSTAEQQGVSPELLSPYFELMRRRLAEGSGEEDLTGV  | 299 |
|              |     |                                                     |     |
| p-IR75       | 251 | STLAMQVAGTPTFLSTAEQQGVSPELLSPYFELMRRRLAEGSGEEDLTGV  | 300 |
| Q82Q44_STRAW | 300 | INLLVH                                              | 305 |
|              |     |                                                     |     |
| p-IR75       | 301 | INLLVH                                              | 306 |

### 2.4.2 Putative imine reductases A0A117QYA8\_9A and p-IR76

|               |     |                                                      |     |
|---------------|-----|------------------------------------------------------|-----|
| A0A117QYA8_9A | 1   | MTQNAVEKESVTLLGLGAMGTALARTWLAAGHPLTVWNRTPARAASLAAD   | 50  |
|               |     |                                                      |     |
| p-IR76        | 1   | MTQNAVEKESVTLLGLGAMGTALARTWLAAGHPLTVWNRTPARAASLAAD   | 50  |
| A0A117QYA8_9A | 51  | GAKVADSAAAAVAANALVVVCLLDDASVEDALAGTDLAGKDLVNLTSTP    | 100 |
|               |     |                                                      |     |
| p-IR76        | 51  | GAKVADSAAAAVAANALVVVCLLDDASVEDALTGTDLAGKDLVNLTSTP    | 100 |
| A0A117QYA8_9A | 101 | AQARARAEWARERGARYLDGGIMAVPPMIGVPESGGYIFYSGSPELFQRH   | 150 |
|               |     |                                                      |     |
| p-IR76        | 101 | AQARARAEWARERGARYLDGGIMAVPPMIGVPESGGYIFYSGSPELFQRH   | 150 |
| A0A117QYA8_9A | 151 | RETLVVPAGTVVYVGHDAAGFAALYDMALLSAMYGMFAGAAHAFALIRKEDI | 200 |
|               |     |                                                      |     |
| p-IR76        | 151 | RETLVVPAGTVVYVGHDAAGFAALYDMALLSAMYGMFAGAAHAFALIRKEDI | 200 |
| A0A117QYA8_9A | 201 | DPASLAPLLADWLAMAPAVHRTADQLRSGDYTQGVVSNLAMQVAGTPAF    | 250 |
|               |     |                                                      |     |
| p-IR76        | 201 | DPASLAPLLADWLAMAPAVHRTADQLRSGDYTQGVVSNLAMQVAGTPAF    | 250 |
| A0A117QYA8_9A | 251 | VSAAEQQGVSPPELLSPYFALMRRRLAEGSGEEDLTGVIDLLVR         | 293 |
|               |     |                                                      |     |
| p-IR76        | 251 | VSAAEQQGVSPPELLSPYFALMRRRLAEGSGEEDLTGVIDLLVR         | 293 |

### 2.4.3 Putative imine reductases A0A117QYA8\_9A and p-IR77

|               |     |                                                      |     |
|---------------|-----|------------------------------------------------------|-----|
| A0A117QYA8_9A | 1   | MTQNAVEKESVTLLGLGAMGTALARTWLAAGHPLTVWNRTPARAASLAAD   | 50  |
|               |     |                                                      |     |
| p-IR77        | 1   | MTQNAVEKESVTLLGLGAMGTALARTWLAAGHPLTVWNRTPARAASLAAD   | 50  |
| A0A117QYA8_9A | 51  | GAKVADSAAAAVAANALVVVCLLDDASVEDALAGTDLAGKDLVNLTSTP    | 100 |
|               |     |                                                      |     |
| p-IR77        | 51  | GAKVADSAAAAVAANALVVVCLLDDASVEDALAGTDLAGKDLVNLTSTP    | 100 |
| A0A117QYA8_9A | 101 | AQARARAEWARERGARYLDGGIMAVPPMIGVPESGGYIFYSGSPELFQRH   | 150 |
|               |     |                                                      |     |
| p-IR77        | 101 | AQARARAEWARERGARYLDGGIMAVPPMIGVPESGDYIFYSGSPELFQRH   | 150 |
| A0A117QYA8_9A | 151 | RETLVVPAGTVVYVGHDAAGFAALYDMALLSAMYGMFAGAAHAFALIRKEDI | 200 |
|               |     |                                                      |     |
| p-IR77        | 151 | RETLVVPAGTVVYVGHDAAGFAALYDMALLSAMYGMFAGAAHAFALIRKEDI | 200 |
| A0A117QYA8_9A | 201 | DPASLAPLLADWLAMAPAVHRTADQLRSGDYTQGVVSNLAMQVAGTPAF    | 250 |
|               |     |                                                      |     |
| p-IR77        | 201 | DPASLAPLLADWLAMAPAVHRTADQLRSGDYTQGVVSNLAMQVAGTPAF    | 250 |
| A0A117QYA8_9A | 251 | VSAAEQQGVSPPELLSPYFALMRRRLAEGSGEEDLTGVIDLLVR         | 293 |
|               |     |                                                      |     |
| p-IR77        | 251 | VSAAEQQGVSPPELLSPYFALVRRRLAEGSGEEDLTGVIDLLVR         | 293 |



#### 2.4.4 Putative imine reductases A0A0M9XDJ7\_ST and p-IR85

|               |     |                                                     |     |
|---------------|-----|-----------------------------------------------------|-----|
| A0A0M9XDJ7_ST | 1   | MRSEPAAVTVLGLGSMGTALAGALLKGGHATTVWNRSPHKAKLLAERGAT  | 50  |
|               |     |                                                     |     |
| p-IR85        | 1   | MRSEPAAVTVLGLGSMGTALAGALLKGGHATTVWNRSPHKAKPLAERGAT  | 50  |
|               |     |                                                     |     |
| A0A0M9XDJ7_ST | 51  | VAATPEEAVAASPLVIACVLDYAALYTVLDPVADSLAGKTLVNLTSGSPE  | 100 |
|               |     | :     :                                             |     |
| p-IR85        | 51  | VAATPEEAVAASPLLIACVLDYAALHTVLDPVADSLAGKTLVNLTSGSPE  | 100 |
|               |     | :     :                                             |     |
| A0A0M9XDJ7_ST | 101 | QAEEAAAWARSHGAHYLDGAIMTTPPGVGSPMMFLYSGERTVFDTHRPA   | 150 |
|               |     | :     :                                             |     |
| p-IR85        | 101 | QAEEAAAWARAHAHYLDGAIMTTPPGVGSPMMFLYSGERTVFDTHRPV    | 150 |
|               |     | :     :                                             |     |
| A0A0M9XDJ7_ST | 151 | LASLGDPLYLGTDPGLASLYDAALLGLMWAAMTGWLHGTALVGAEGTPAT  | 200 |
|               |     | :                                                   |     |
| p-IR85        | 151 | LASLGDPLHLGTDPGLASLYDAALLGLMWAAMTGWLHGTALVGAEGTPAT  | 200 |
|               |     | :                                                   |     |
| A0A0M9XDJ7_ST | 201 | AFTPVAIRWLSAMTGFLLTTYAPQVDAGHYPGDDATVDVQIAAIDHLIHAA | 250 |
|               |     | :                                                   |     |
| p-IR85        | 201 | AFTPVAIRWLSAVTGFLLTTYAPQVDAGHYPGDDATVDVQIAAIDHLIHAA | 25  |
|               |     | :                                                   |     |
| A0A0M9XDJ7_ST | 251 | AARGVDNALPELLKATMERTRAAGHGSSSYASVIETLR-AAGTR        | 293 |
|               |     |                                                     |     |
| p-IR85        | 251 | AARGVDNALPELLKATMERTRAAGHGSSSYASVIETLRKAAGTR        | 294 |
|               |     |                                                     |     |

#### 2.4.5 Putative imine reductases p-IR89 (G2QG78\_MYCTT) and p-IR90

|              |     |                                                     |     |
|--------------|-----|-----------------------------------------------------|-----|
| G2QG78_MYCTT | 1   | MATITSIGIGNMGAALASALLKSVGLRQLTIWNRTADRPQVKSVEQGAH   | 50  |
|              |     |                                                     |     |
| p-IR90       | 1   | MATITSIGIGNMGAALASALLKSVGLRQLTIWNRTADRPQVKSVEQGAH   | 5   |
|              |     |                                                     |     |
| G2QG78_MYCTT | 51  | FEPSVAAAVARSDTILICLLDYQTVTAVFEAISPGLAGKTVINVTNGTP   | 100 |
|              |     | :                                                   |     |
| p-IR90       | 51  | FEPSVAAAVARSDTILICLLDYQTVIAVFEAISPGLAGKTVINVTNGTP   | 100 |
|              |     | :                                                   |     |
| G2QG78_MYCTT | 101 | RQAREAEARFKGLGAAAAYFDGGIMVTPQQIGTPEAFVILSGEDESAFRA  | 150 |
|              |     |                                                     |     |
| p-IR90       | 101 | RQAREAEARFKGLGAAAAYFDGGIMVTPQQIGTPEAFVILSGEDESAFRA  | 150 |
|              |     |                                                     |     |
| G2QG78_MYCTT | 151 | AGGPAELLEPIGAIQYVASDAGAAAALYDLAALAAMFGMFAAFTGIALLK  | 200 |
|              |     |                                                     |     |
| p-IR90       | 151 | AGGPAELLEPIGAIQYVASDAGAAAALYDLAALAAMFGMFAAFTGIALLK  | 200 |
|              |     |                                                     |     |
| G2QG78_MYCTT | 201 | KQKRQRQDGGKEEGDRDNKALAKPATDSVIVPVLNALVPYVGMIADEVDR  | 250 |
|              |     |                                                     |     |
| p-IR90       | 201 | KQKRQRQDGGKEEGDRDNKALAKPATDSVIVPVLNALVPYVGMIADEVDR  | 250 |
|              |     |                                                     |     |
| G2QG78_MYCTT | 251 | ENWMNDMGNPLKMQAIALHNILRACEEEGVDGEGGLKFISRRMDRAVADGF | 300 |
|              |     |                                                     |     |
| p-IR90       | 251 | ENWMNDMGNPLKMQAIALHNILRACEEEGVDGEGGLKFISRRMDRAVADGF | 300 |
|              |     |                                                     |     |
| G2QG78_MYCTT | 301 | GPGGVSIAIARYMFK                                     | 314 |
|              |     |                                                     |     |
| p-IR90       | 301 | GPGGVSIAIARYMFK                                     | 314 |
|              |     |                                                     |     |

## 2.5 Production of *B. subtilis* glucose dehydrogenase

The gene for the glucose dehydrogenases from *Bacillus subtilis* was subcloned into a pET-15b vector. For the transformation of plasmid DNA into *E. coli*, chemically competent *E. coli* cells were thawed on ice for ten minutes. The *B. subtilis* GDH/pET-15b plasmid DNA solution (1  $\mu\text{L}$ ) was added to the cell suspension and gently mixed. The cells were incubated on ice for 30 min, after which the cells were heat shocked. DH5 $\alpha$  cells, for DNA isolation and sequencing, were heat shocked at 42°C for thirty seconds, while BL21 (DE3) cells for protein expression were heat shocked at 42°C for ten seconds. Following this, the cells were returned to ice for ten minutes. SOC media (300  $\mu\text{L}$ ) was added and the cells incubated at 37°C with shaking at 250 rpm for one hour prior to plating onto LB agar supplemented with ampicillin (100 mg L<sup>-1</sup>).

Production of the *B. subtilis* GDH biocatalyst was achieved in *E. coli* BL21 (DE3) cells which had been transformed with the BsGDH/pET-15b plasmid. A single colony picked from an agar plate grown overnight was inoculated into 5 mL LB medium supplemented with ampicillin (100 mg L<sup>-1</sup>) and incubated overnight at 37°C in an orbital shaker at 250 rpm. This starter culture was used as the inoculum for a 500 mL culture in LB medium supplemented with ampicillin (100 mg L<sup>-1</sup>). The culture was then incubated at 30°C in an orbital shaker at 250 rpm until it reached an OD<sub>600nm</sub> of between 0.6 and 0.8. IPTG (0.5 mM) was added to induce protein expression, after which cell cultivation was continued at 20°C and 250 rpm for 16 hours.

Cells from a 500 mL culture were harvested by centrifugation (2,831 rcf, 20 min) and the pellet resuspended in 100 mL potassium phosphate buffer (100 mM, pH 7.0). Following cell disruption by sonication (4°C, 20 min, 30 sec pulse, 30 sec off, repeat x 20), the suspension was centrifuged at 39,191 rcf for 20 min. The resulting clarified lysate was either divided into aliquots, snap-frozen in liquid nitrogen and stored at -80°C until use, or snap-frozen in liquid nitrogen, lyophilized and then stored at -20°C until use.

## 2.6 Synthetic procedures and characterisation data for chemical standards

### 2.6.1 Reductive amination procedure A

To a stirred solution of 1-indanone (264 mg, 2.0 mmol) in dry THF (10 mL, 200 mM) under N<sub>2</sub> were added the amine nucleophile (2.2 mmol – 4.0 mmol), Na(OAc)<sub>3</sub>BH (0.636 g, 3.0 mmol) and glacial AcOH (154 μL, 2.0 mmol). The reaction was stirred for 16 hours at 20°C under N<sub>2</sub> then quenched by addition of 5 M NaOH (10 mL) and extracted with EtOAc (3 x 20 mL). The combined organic phases were then extracted with 1 M HCl (3 x 20 mL) and the aqueous phase basified (pH 12) by addition of 5 M NaOH. The product was extracted with EtOAc (3 x 20 mL). The combined organic phases were washed with brine (20 mL), dried over MgSO<sub>4</sub> and the solvent removed under reduced pressure to afford the corresponding secondary amine.

#### *N*-propargyl-1-aminoindan 10

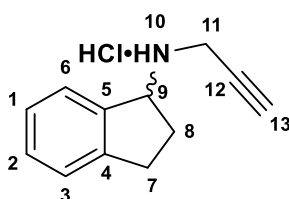

Grey solid isolated, 49% yield. <sup>1</sup>H NMR δ<sub>H</sub> (400 MHz, CDCl<sub>3</sub>): 7.80 – 7.71 (m, 1 H, C3-*H*), 7.39 – 7.21 (m, 3 H, C1-*H*, C2-*H*, C6-*H*), 4.95 – 4.88 (m, 1 H, C9-*H*), 3.67 – 3.61 (br s, 2 H, C11-*H*), 3.44 (dt, *J* = 8.2, 8.1 Hz, 1 H, C7-*H*<sub>a</sub>), 2.97 – 2.87 (m, 1 H, C7-*H*<sub>b</sub>), 2.59 (t, *J* = 2.6 Hz, 1 H, C13-*H*), 2.50 – 2.39 (m, 2 H, C8-*H*). <sup>13</sup>C NMR δ<sub>C</sub> (100 MHz, CDCl<sub>3</sub>): 145.4 (C5), 135.6 (C4), 130.1 (C6), 127.0 (C3), 126.4 (C1/C2), 125.6 (C1/C2), 78.2 (C12), 73.3 (C13), 60.7 (C9), 33.5 (C11), 30.5 (C7), 28.8 (C8). HRMS calcd. for C<sub>12</sub>H<sub>14</sub>N<sup>+</sup> 172.1126 [M]<sup>+</sup>, found 172.1120.

### 2.6.2 Reductive amination procedure B

To a stirred solution of the ketone (2.0 mmol) in dry MeOH (5 mL) over 4 Å molecular sieves under N<sub>2</sub> was added the amine nucleophile (2.2 - 4.0 mmol). The reaction was stirred at 20°C overnight, after which the solution was cooled to 0°C and NaBH<sub>4</sub> (0.151 g, 4.0 mmol) added over 10 minutes. The mixture was stirred for a further 2 hours, then the solvent removed under reduced pressure. The resulting slurry was resuspended in EtOAc (10 mL), filtered, and the solid washed with EtOAc (2 x 5 mL). The combined organic phases were extracted with 1 M HCl (3 x 10 mL). The combined aqueous phases were then basified (pH 12) with 5 M NaOH and extracted with EtOAc (3 x 10 mL). The combined organic phases were washed with brine (10 mL), dried over MgSO<sub>4</sub> and the solvent removed under reduced pressure to afford the corresponding secondary amine.

#### *N*-butylcyclohexylamine 4

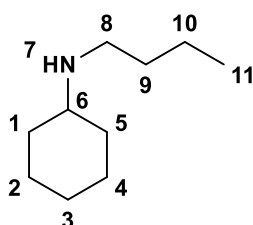

Yellow oil isolated, 88% yield. <sup>1</sup>H NMR δ<sub>H</sub> (400 MHz, CDCl<sub>3</sub>): 2.59 (t, *J* = 7.3 Hz, 2 H, C8-*H*), 3.44 – 3.33 (m, 1 H, C6-*H*), 1.90 – 1.80 (m, 2 H, C1-*H*, C5-*H*), 1.76 – 1.65 (m, 2 H, C2-*H*, C4-*H*), 1.64 – 1.52 (m, 1 H, C3-*H*), 1.50 – 1.38 (m, 2 H, C9-*H*), 1.37 – 0.97 (m, 7 H, C1-*H*, C2-*H*, C3-*H*, C4-*H*, C5-*H*, C10-*H*), 0.89 (t, *J* = 7.2 Hz, 3 H, C11-*H*). <sup>13</sup>C NMR δ<sub>C</sub> (100 MHz, CDCl<sub>3</sub>): 56.6 (C6), 46.4 (C8), 33.2

(C1, C5), 32.2 (C9), 25.9 (C2, C4), 24.8 (C3), 20.3 (C10), 13.7 (C11). **HRMS** calcd. for  $C_{10}H_{22}N^+$  156.1752  $[M+H]^+$ , found 156.1754.

#### ***N*-cyclohexylphenethylamine 5**

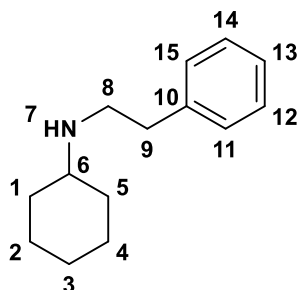

Orange oil isolated, 80% yield.  $^1H$  NMR  $\delta_H$  (400 MHz,  $CDCl_3$ ): 7.41 – 7.20 (m, 5 H, C11-*H*, C12-*H*, C13-*H*, C14-*H*, C15-*H*), 3.06 – 2.91 (m, 2 H, C8-*H*), 2.90 – 2.77 (m, 2 H, C9-*H*), 2.57 – 2.46 (m, 1 H, C6-*H*), 2.36 (br s, 1 H, N7-*H*), 1.99 – 1.87 (m, 2 H, C1-*H*, C5-*H*), 1.83 – 1.71 (m, 2 H, C2-*H*, C4-*H*), 1.70 – 1.61 (m, 1 H, C3-*H*), 1.37 – 1.07 (m, 5 H, C1-*H*, C2-*H*, C3-*H*, C4-*H*, C5-*H*).  $^{13}C$  NMR  $\delta_C$  (100 MHz,  $CDCl_3$ ): 139.5 (C10), 128.3 (C11, C15/C12, C14), 128.1 (C11, C15/C12, C14), 125.8 (C13), 56.3 (C6), 47.5 (C8), 35.7 (C9), 32.6 (C1, C5), 25.7 (C2, C4), 24.7 (C3). **HRMS** calcd. for  $C_{14}H_{22}N^+$  204.1752  $[M+H]^+$ , found 204.1749.

#### ***N*-(1-phenylethyl)cyclopropylamine 11**

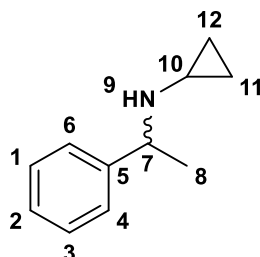

Yellow oil isolated, 31% yield.  $^1H$  NMR  $\delta_H$  (400 MHz,  $CDCl_3$ ): 7.34 – 7.14 (m, 5 H, C1-*H*, C2-*H*, C3-*H*, C4-*H*, C6-*H*), 3.83 (q,  $J = 6.7$  Hz, 1 H, C7-*H*), 3.01 (br s, 1 H, N9-*H*), 1.95 – 1.86 (m, 1 H, C10-*H*), 1.34 (d,  $J = 6.7$  Hz, 3 H, C8-*H*), 0.39 – 0.25 (m, 4 H, C11-*H*, C12-*H*).  $^{13}C$  NMR  $\delta_C$  (100 MHz,  $CDCl_3$ ): 144.8 (C5), 128.4 (C1, C3), 126.7 (C2, C4, C6), 58.4 (C7), 28.7 (C10), 23.0 (C8), 6.04 (C11, C12). **HRMS** calcd. for  $C_{11}H_{16}N^+$  162.1283  $[M+H]^+$ , found 162.1283.

#### **4-(2-(cyclopropylamino)propyl)phenol 12**

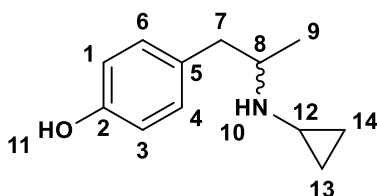

Orange oil isolated, 87% yield.  $^1H$  NMR  $\delta_H$  (400 MHz,  $CDCl_3$ ): 7.01 (d,  $J = 8.1$  Hz, 2 H, C4-*H*, C6-*H*), 6.74 (d,  $J = 8.1$  Hz, C1-*H*, C3-*H*), 3.12 – 3.02 (m, 1 H, C8-*H*), 2.79 – 2.68 (m, 1 H, C7-*H*<sub>a</sub>), 2.65 – 2.56 (m, 1 H, C7-*H*<sub>b</sub>), 2.16 – 2.09 (m, 1 H, C12-*H*), 1.17 (d,  $J = 6.2$  Hz, 2 H, C9-*H*), 0.61 – 0.37 (m, 4 H, C13-*H*, C14-*H*).  $^{13}C$  NMR  $\delta_C$  (100 MHz,  $CDCl_3$ ): 155.4 (C2), 130.2 (C4, C6), 129.24 (C5), 115.7 (C1, C3), 55.8 (C8), 41.6 (C7), 28.5 (C12), 19.2 (C9), 6.3 (C13, C14). **HRMS** calcd. for  $C_{12}H_{18}NO^+$  192.1388  $[M+H]^+$ , found 192.1378.

### ***N*-(1-(4-methoxyphenyl)propan-2-yl)cyclopropylamine 13**

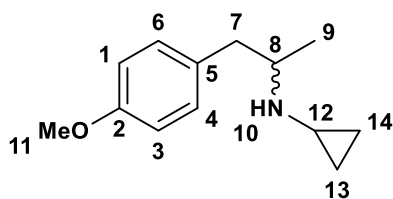

Yellow oil isolated, 81% yield.  $^1\text{H NMR}$   $\delta_{\text{H}}$  (400 MHz,  $\text{CDCl}_3$ ): 7.12 (d,  $J = 8.6$  Hz, 2 H, C4-*H*, C6-*H*), 6.85 (d,  $J = 8.6$  Hz, 2 H, C1-*H*, C3-*H*), 3.80 (s, 3 H, C11-*H*), 3.06 – 2.95 (m, 1 H, C8-*H*), 2.71 (dd,  $J = 6.7, 6.5$  Hz, 1 H, C7-*H*<sub>a</sub>), 2.56 (dd,  $J = 13.5, 6.5$  Hz, 1 H, C7-*H*<sub>b</sub>), 2.06 (tt,  $J = 6.8, 7.2$  Hz, 1 H, C12-*H*), 1.11 (d,  $J = 6.4$  Hz, 3 H, C9-*H*), 0.54 – 0.26 (m, 4 H, C13-*H*, C14-*H*).  $^{13}\text{C NMR}$   $\delta_{\text{C}}$  (100 MHz,  $\text{CDCl}_3$ ): 157.8 (C2), 131.3 (C5), 130.0 (C4, C6), 113.6 (C1, C3), 55.4 (C11), 55.0 (C8), 42.4 (C7), 28.5 (C12), 20.2 (C9), 6.9 (C13, C14). **HRMS** calcd. for  $\text{C}_{13}\text{H}_{20}\text{NO}^+$  206.1545  $[\text{M}+\text{H}]^+$ , found 206.1547.

### ***N*-benzyl-1-methoxy-2-propylamine 14**

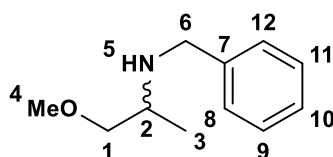

Colourless oil isolated, 80% yield.  $^1\text{H NMR}$   $\delta_{\text{H}}$  (400 MHz,  $\text{CDCl}_3$ ): 7.34 – 7.03 (m, 5 H, C8-*H*, C9-*H*, C10-*H*, C11-*H*, C12-*H*), 3.81 (s, 2 H, C6-*H*), 3.67 (d,  $J = 6.6$  Hz, 1 H, C1-*H*<sub>a</sub>), 3.50 (d,  $J = 6.6$  Hz, 1 H, C1-*H*<sub>b</sub>), 3.27 (s, 3 H, C4-*H*), 2.93 – 2.84 (m, 1 H, C2-*H*), 2.73 (br s, 1 H, N5-*H*), 1.01 (d,  $J = 6.5$  Hz, 3 H, C3-*H*).  $^{13}\text{C NMR}$   $\delta_{\text{C}}$  (100 MHz,  $\text{CDCl}_3$ ): 140.3 (C7), 128.3 (C8, C12/C9, C10), 128.1 (C8, C12/C9, C10), 127.4 (C10), 58.7 (C2), 51.7 (C4), 51.2 (C6), 45.5 (C1), 16.8 (C3). **HRMS** calcd. for  $\text{C}_{11}\text{H}_{18}\text{NO}^+$  180.1388  $[\text{M}+\text{H}]^+$ , found 180.1376.

## 2.7 Chromatographic analysis

### 2.7.1 Conditions and retention times

#### 2.7.1.1 Analysis with Agilent 7890B gas chromatograph

Retention times for GC-FID analysis with an achiral stationary phase. Phenomenex ZB WAXplus column, inlet temperature: 250°C, detector temperature: 225°C, flow rate: 5.0 mL min<sup>-1</sup>, temperature program: 50°C (0.5 min), 50°C min<sup>-1</sup> (250°C), 250°C (0.5 min).

| Compound                                              | Retention Time / min |
|-------------------------------------------------------|----------------------|
| cyclohexanol                                          | 1.8                  |
| 2-methylcyclohexanol                                  | 1.8                  |
| 1-indanol                                             | 3.3                  |
| 1-phenylethanol                                       | 2.7                  |
| 1-(4-hydroxyphenyl)-2-propanol                        | 3.8                  |
| 1-(4-methoxyphenyl)-2-propanol                        | 3.9                  |
| 1-methoxy-2-propanol                                  | 1.3                  |
| cyclohexanone                                         | 1.4                  |
| 2-methylcyclohexanone                                 | 1.5                  |
| 1-indanone                                            | 3.2                  |
| acetophenone                                          | 2.4                  |
| 1-(4-hydroxyphenyl)-2-propanone                       | 3.4                  |
| 1-(4-methoxyphenyl)-2-propanone                       | 3.4                  |
| methoxyacetone                                        | 0.9                  |
| butylamine                                            | 0.8                  |
| phenethylamine                                        | 2.4                  |
| aniline                                               | 2.6                  |
| benzylamine                                           | 2.3                  |
| <i>N</i> -cyclopropylcyclohexylamine <b>3</b>         | 1.6                  |
| <i>N</i> -butylcyclohexylamine <b>4</b>               | 2.0                  |
| <i>N</i> -phenethylcyclohexylamine <b>5</b>           | 3.7                  |
| <i>N</i> -cyclohexylaniline <b>6</b>                  | 3.5                  |
| <i>N</i> -benzylcyclohexylamine <b>7</b>              | 3.3                  |
| <i>N</i> -isopropylcyclohexylamine <b>8</b>           | 1.7                  |
| <i>N</i> -(2-methylcyclohexyl)acetamide               | 3.2 (A), 3.3 (B)     |
| <i>N</i> -(1-phenylethyl)cyclopropylamine <b>10</b>   | 2.4                  |
| <i>N</i> -propargyl-1-aminoindan <b>11</b>            | 3.5                  |
| <i>N</i> -(4-hydroxy)cyclopropylamphetamine <b>12</b> | 3.5                  |
| <i>N</i> -(4-methoxy)cyclopropylamphetamine <b>13</b> | 3.6                  |
| <i>N</i> -benzyl-1-methoxypropan-2-amine <b>14</b>    | 2.8                  |

### 2.7.1.2 Analysis with Agilent 6850 gas chromatograph

**Retention times for GC-FID analysis under general conditions with a chiral stationary phase.** CP-Chirasil-

Dex CB column, inlet temperature: 200°C; detector temperature: 250°C; flow rate: 1.2 mL min<sup>-1</sup>; temperature program: 50°C (0 min), 5°C min<sup>-1</sup> (200°C), 200°C (2 min).

| Compound                                                  | Retention Time / min |
|-----------------------------------------------------------|----------------------|
| cyclohexanol                                              | 12.9                 |
| 1-indanol                                                 | 19.3 (A), 19.4 (B)   |
| cyclohexanone                                             | 10.3                 |
| 2-methylcyclohexanone                                     | 9.7 (A), 9.8 (B)     |
| 1-indanone                                                | 18.0                 |
| acetophenone                                              | 11.9                 |
| 1-(4-hydroxyphenyl)-2-propanone                           | 26.2                 |
| 1-(4-methoxyphenyl)-2-propanone                           | 20.1                 |
| methoxyacetone                                            | 3.1                  |
| phenethylamine                                            | 13.6                 |
| aniline                                                   | 13.1                 |
| benzylamine                                               | 13.0                 |
| <i>N</i> -cyclopropylcyclohexylamine <b>3</b>             | 14.2                 |
| <i>N</i> -butylcyclohexylamine <b>4</b>                   | 14.3                 |
| <i>N</i> -phenethylcyclohexylamine <b>5</b>               | 25.0                 |
| <i>N</i> -cyclohexylaniline <b>6</b>                      | 18.9                 |
| <i>N</i> -benzylcyclohexylamine <b>7</b>                  | 24.2                 |
| <i>N</i> -isopropylcyclohexylamine <b>8</b>               | 11.2                 |
| 2-methylcyclohexylamine <b>9</b>                          | 9.5 (A), 10.6 (B)    |
| <i>rac-N</i> -propargyl-1-aminoindan <b>10</b>            | 21.6 (S), 21.8 (R)   |
| <i>rac-N</i> -(1-phenylethyl)cyclopropylamine <b>11</b>   | 15.8 (A), 15.9 (B)   |
| <i>rac-N</i> -(4-hydroxy)cyclopropylamphetamine <b>12</b> | 25.5                 |
| <i>rac-N</i> -(4-methoxy)cyclopropylamphetamine <b>13</b> | 27.3                 |
| <i>rac-N</i> -benzyl-1-methoxypropan-2-amine <b>14</b>    | 18.4                 |

**Retention times for GC-FID analysis of substrates and products under conditions optimized for faster analysis of higher-boiling compounds with a chiral stationary phase.** CP-Chirasil-Dex CB column, inlet

temperature: 200°C; detector temperature: 250°C; flow rate: 1.2 mL min<sup>-1</sup>; temperature program: 50°C (0 min), 10°C min<sup>-1</sup> (110°C), 5°C min<sup>-1</sup> (200°C), 200°C (2 min).

| Compound                    | Retention Time / min |
|-----------------------------|----------------------|
| 2-phenylpiperidine <b>1</b> | 14.9                 |
| 2-phenylpiperidine <b>2</b> | 16.7                 |

**Retention times for GC-FID analysis of substrates and products under conditions optimized for separation of high-boiling enantiomers with a chiral stationary phase.** CP-Chirasil-Dex CB column, inlet

temperature: 200°C; detector temperature: 250°C; flow rate: 1.2 mL min<sup>-1</sup>; temperature program: 50°C (0 min), 10°C min<sup>-1</sup> (150°C), 3°C min<sup>-1</sup> (200°C), 200°C (2 min).

| Compound                            | Retention Time / min                 |
|-------------------------------------|--------------------------------------|
| 2-phenylpiperidine <b>1</b>         | 16.7                                 |
| <i>N</i> -acetyl-2-phenylpiperidine | 20.7 ( <i>S</i> ), 21.0 ( <i>R</i> ) |

**Retention times for GC-FID analysis of substrates and products under conditions optimized for faster separation of low- and high-boiling compounds with a chiral stationary phase.** CP-Chirasil-Dex CB column, inlet temperature: 200°C; detector temperature: 250°C; flow rate: 1.2 mL min<sup>-1</sup>; temperature program: 50°C (0 min), 10°C min<sup>-1</sup> (120°C), 5°C min<sup>-1</sup> (160°C), 10°C min<sup>-1</sup> (200°C), 200°C (2 min).

| Compound                             | Retention Time / min |
|--------------------------------------|----------------------|
| cyclohexanone                        | 6.0                  |
| aniline                              | 7.7                  |
| <i>N</i> -cyclohexylaniline <b>6</b> | 17.9                 |

**Retention times for GC-FID analysis of substrates and products under conditions optimized for faster separation of low-boiling compounds with a chiral stationary phase.** CP-Chirasil-Dex CB column, inlet temperature: 200°C; detector temperature: 250°C; flow rate: 1.2 mL min<sup>-1</sup>; temperature program: 50°C (0 min), 10°C min<sup>-1</sup> (100°C), 5°C min<sup>-1</sup> (130°C), 10°C min<sup>-1</sup> (200°C), 200°C (2 min)

| Compound                             | Retention Time / min |
|--------------------------------------|----------------------|
| cyclohexanone                        | 6.5                  |
| <i>N</i> -cyclopropylcyclohexylamine | 9.5                  |



## 2.7.2 Chromatograms

### 2.7.2.1 Example chromatograms for biocatalytic imine reduction

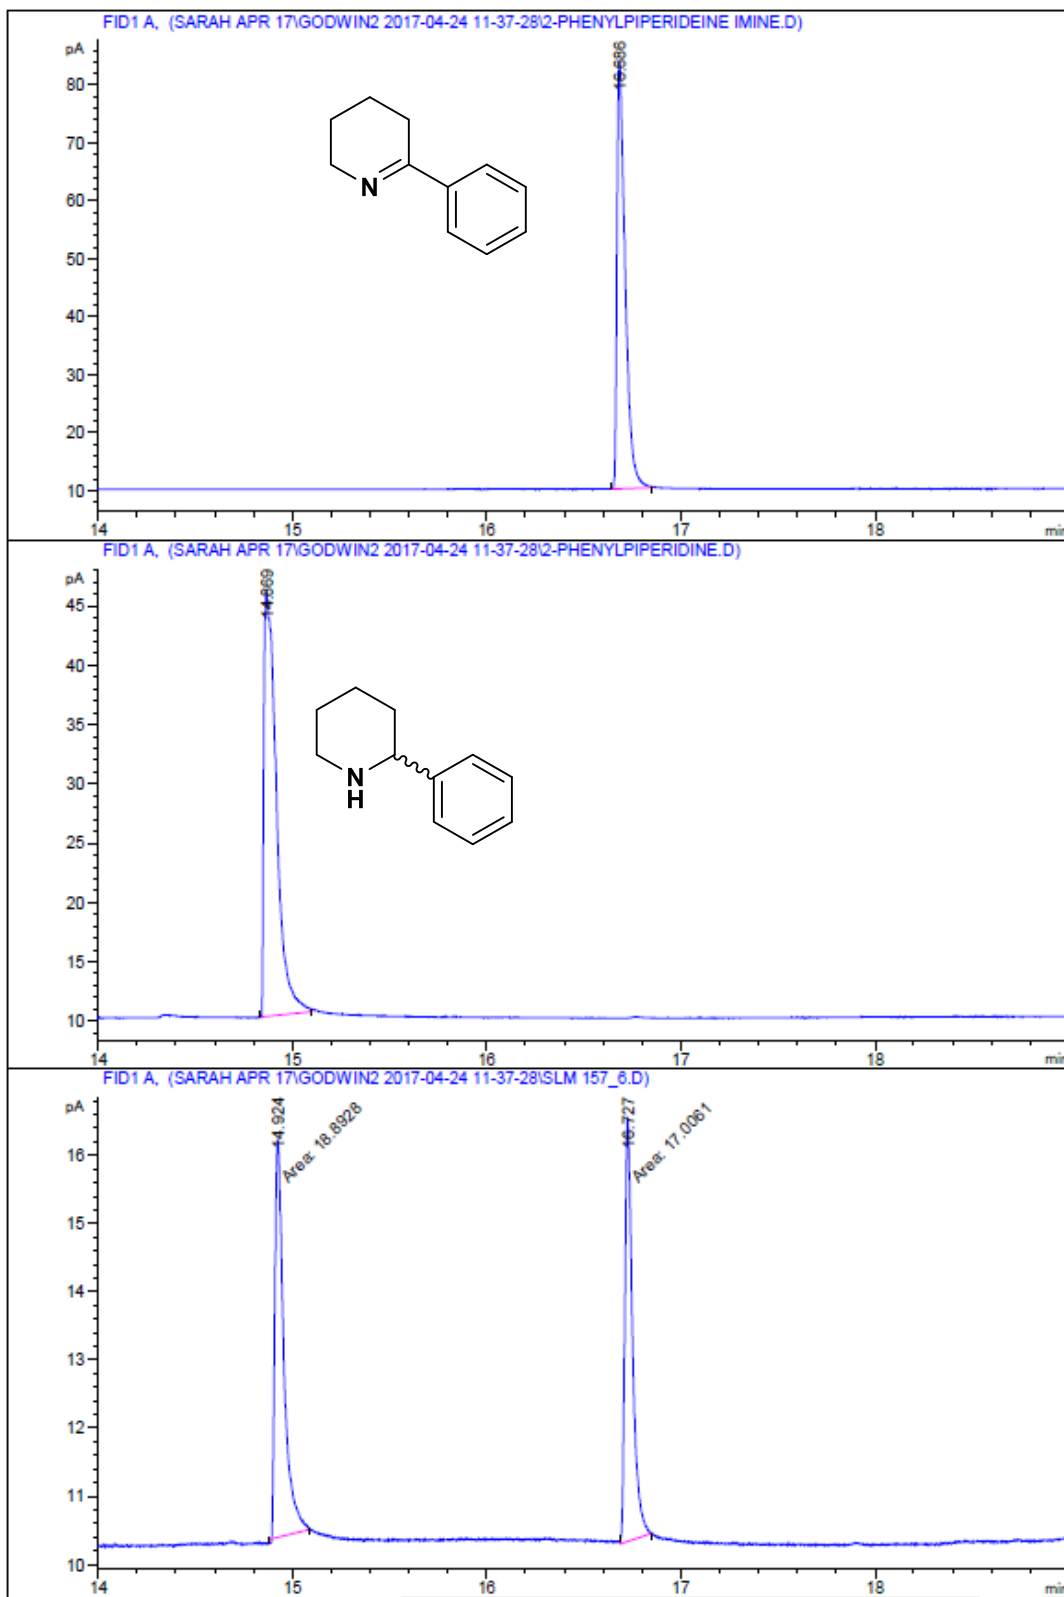

Typical GC-FID chromatogram for the biocatalytic reduction of imines. Reduction of 1 using p-IR84 and *B. subtilis* GDH.

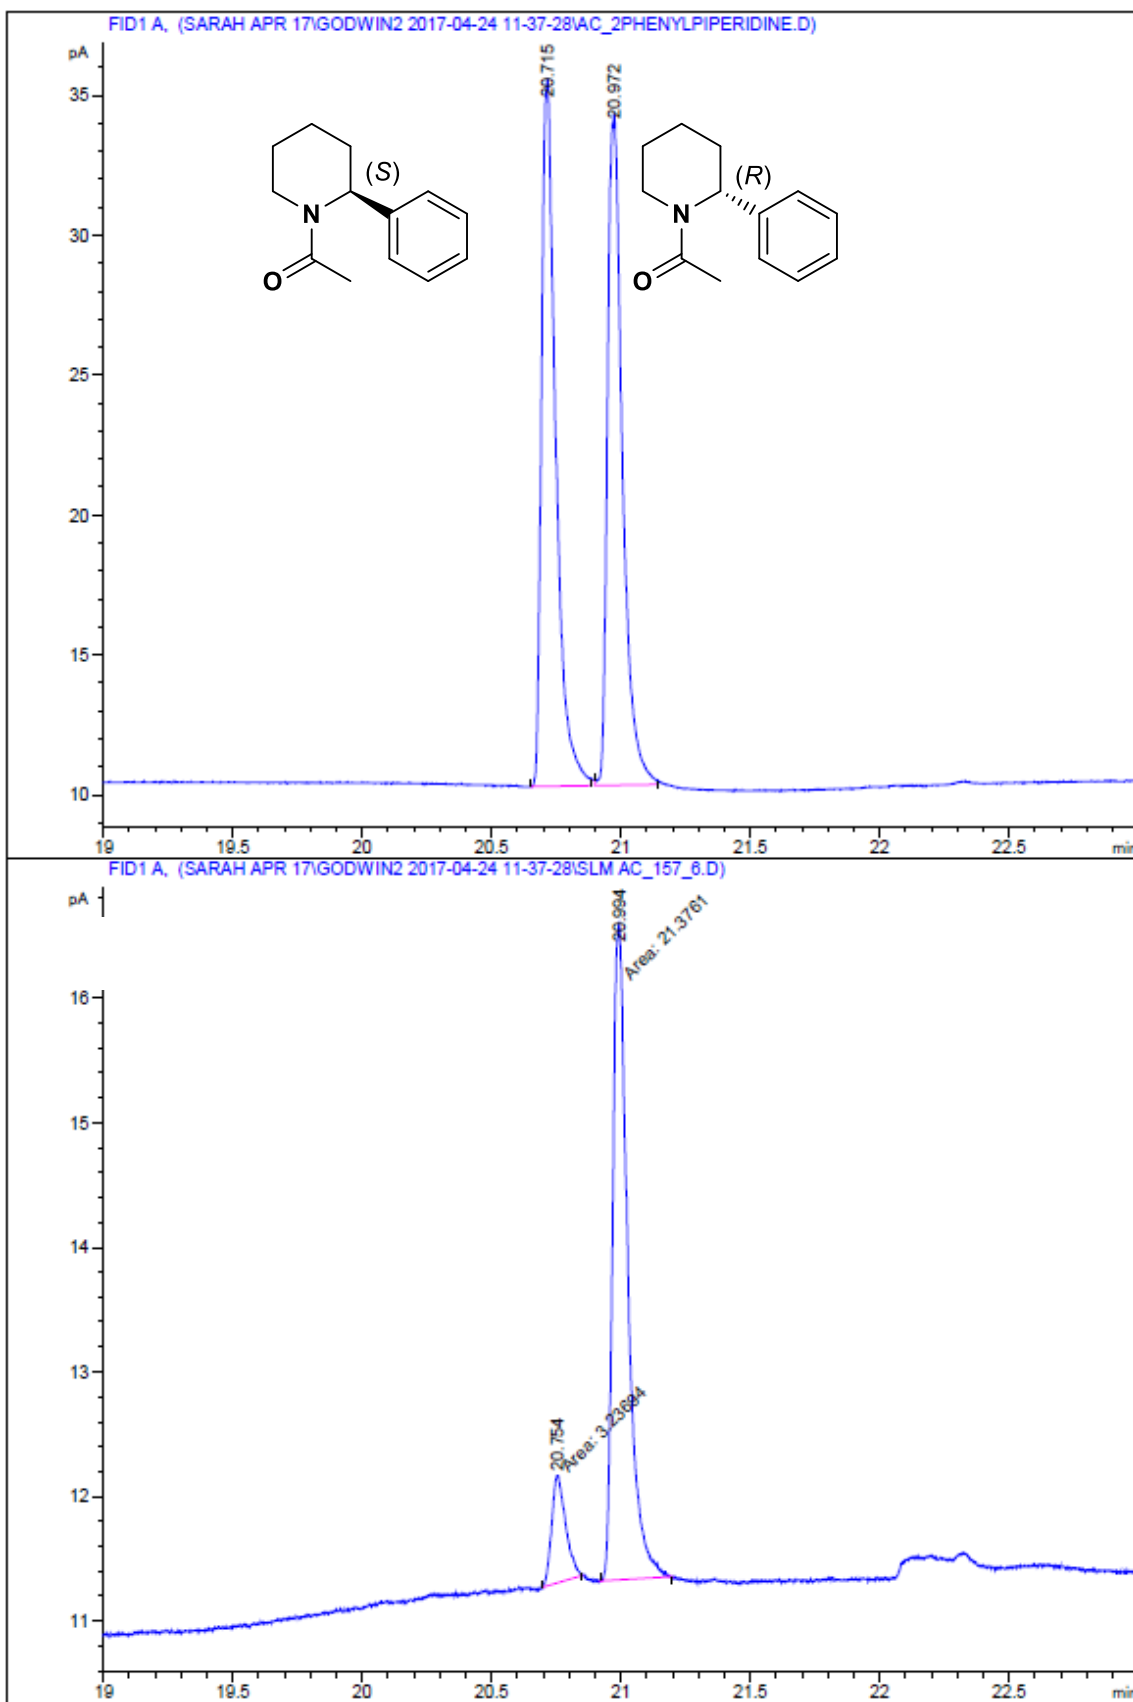

Typical GC-FID chromatogram for determination of enantiomeric excess. Reduction of **1** using IRED p-IR84 and *B. subtilis* GDH.

### 2.7.2.2 Example chromatograms for reductive aminations with cell-free extract

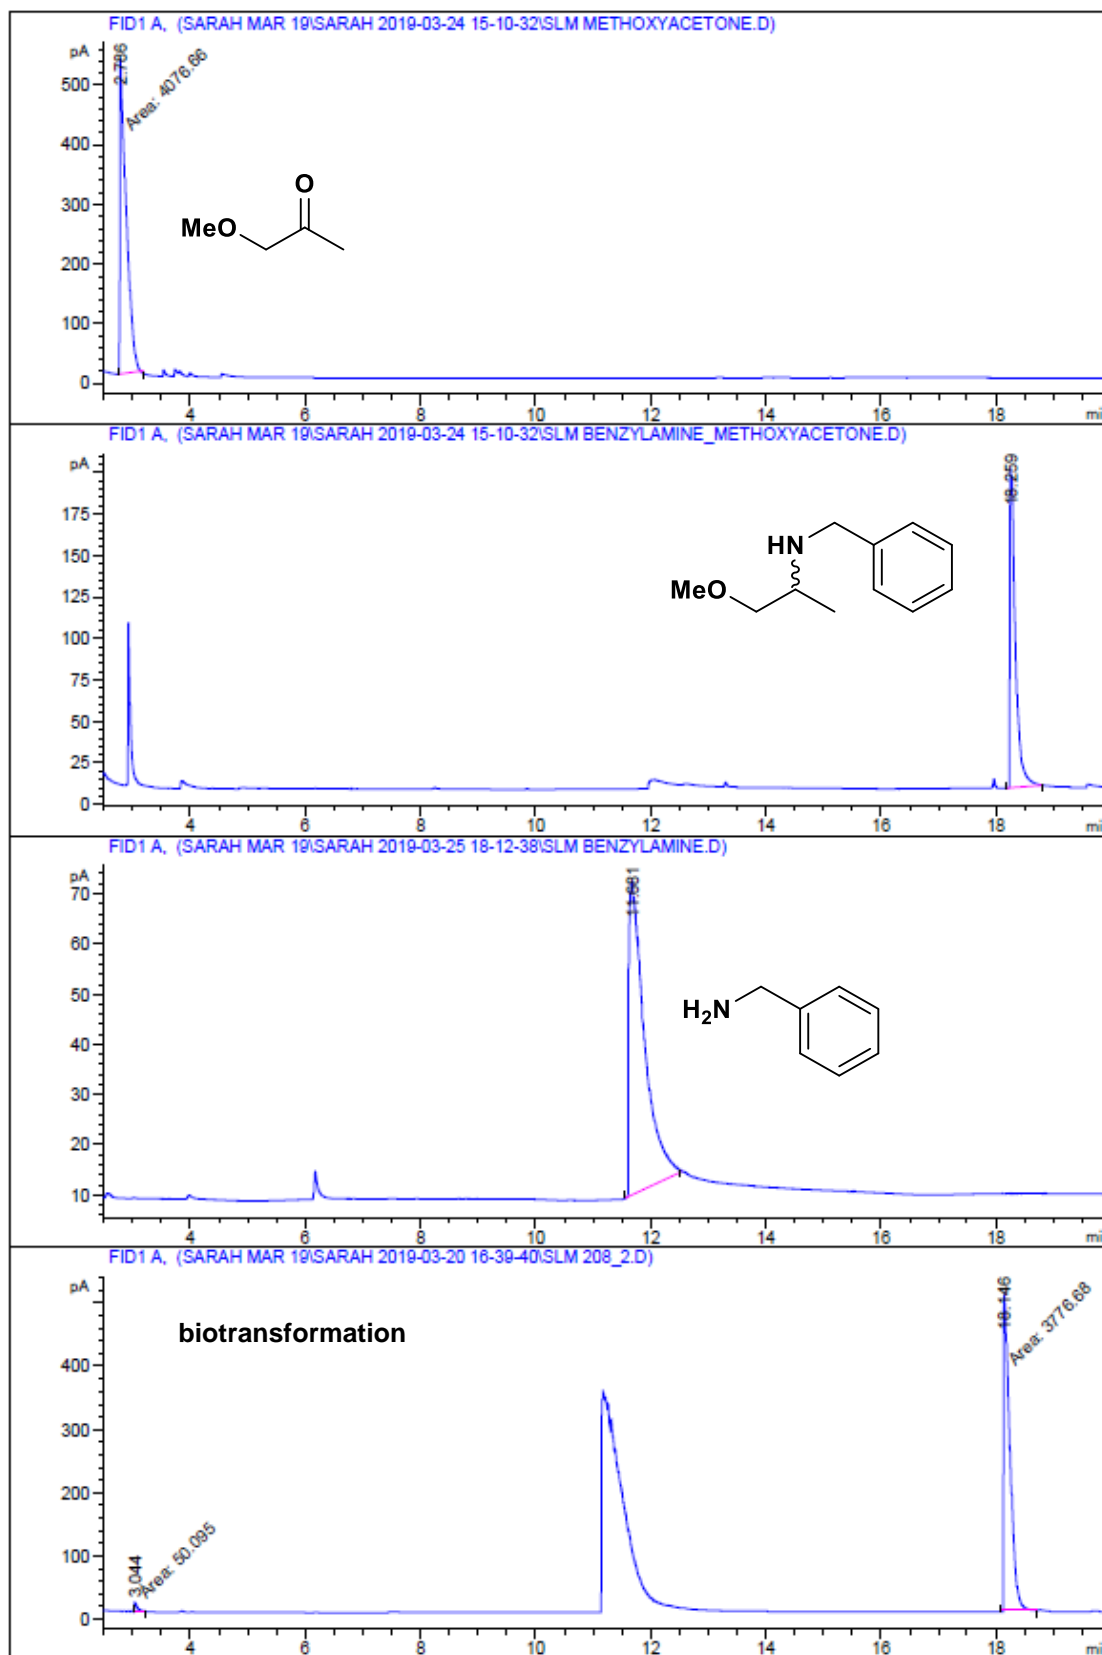

Typical GC-FID chromatogram for biocatalytic reductive amination with IRED CFE. Reductive amination of methoxyacetone with benzylamine using IRED p-IR79 and *B. subtilis* GDH.

### 2.7.2.3 Example chromatograms for reductive aminations with purified enzyme

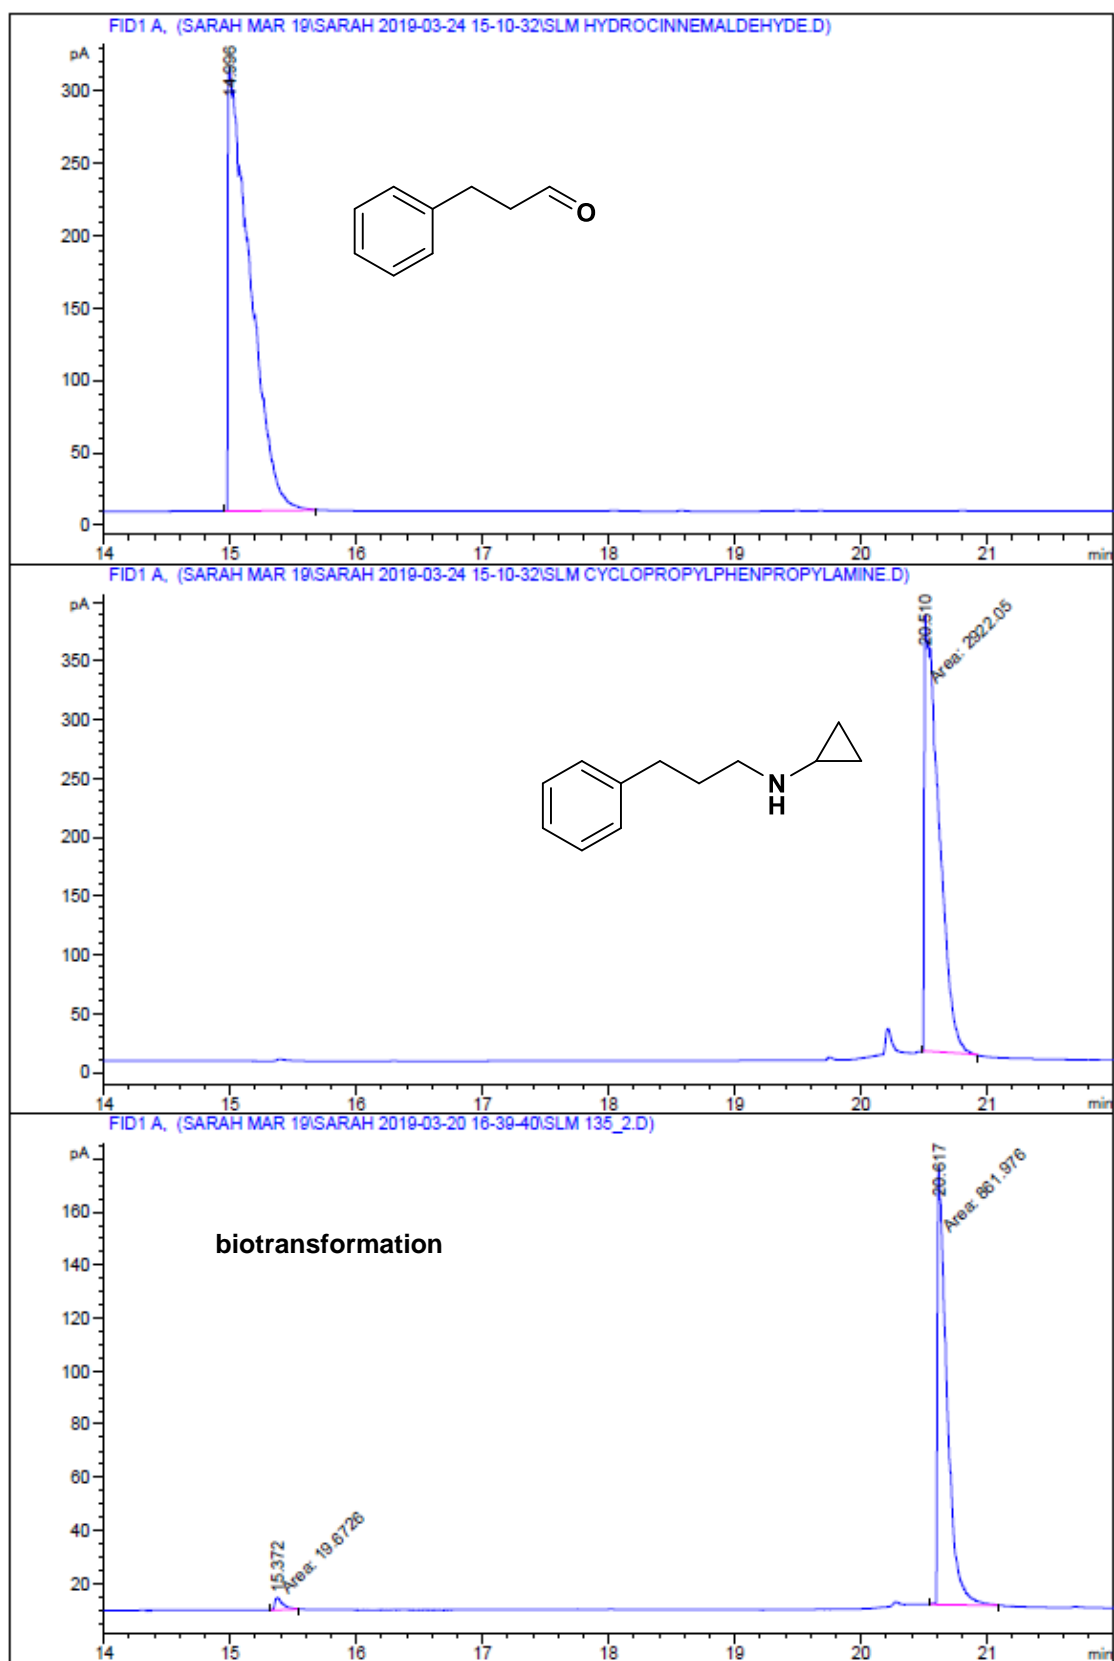

Typical GC-FID chromatogram for biocatalytic reductive amination with purified IRED. Reductive amination of hydrocinnamaldehyde with cyclopropylamine using ArpDHII and *B. subtilis* GDH.
